# Investigating the mechanisms of drug resistance and prognosis in ovarian cancer using single-cell RNA sequencing and bulk RNA sequencing

Pengfei Liu<sup>1</sup>, Jinbao Liu<sup>1</sup>, Jinxing Liu<sup>1</sup>, Xiao Yu<sup>2</sup>

<sup>1</sup>Shandong University of Traditional Chinese Medicine, Jinan, China

<sup>2</sup>Affiliated Hospital of Shandong University of Traditional Chinese Medicine, Jinan, China

**Correspondence to:** Xiao Yu; email: [yuxiao20230316@163.com](mailto:yuxiao20230316@163.com), <https://orcid.org/0009-0005-5025-2438>

**Keywords:** ovarian cancer, single-cell RNA sequencing, bulk RNA sequencing, resistance, prognosis

**Received:** October 16, 2023

**Accepted:** February 2, 2024

**Published:** March 8, 2024

**Copyright:** © 2024 Liu et al. This is an open access article distributed under the terms of the [Creative Commons Attribution License](https://creativecommons.org/licenses/by/4.0/) (CC BY 4.0), which permits unrestricted use, distribution, and reproduction in any medium, provided the original author and source are credited.

## ABSTRACT

Ovarian cancer stands as a prevalent malignancy within the realm of gynecology, and the emergence of resistance to chemotherapeutic agents remains a pivotal impediment to both prognosis and treatment. Through a single-cell level investigation, we scrutinize the drug resistance and mitotic activity of the core tumor cells in ovarian cancer. Our study revisits the interrelationships and temporal trajectories of distinct epithelial cells (EPCs) subpopulations, while identifying genes associated with ovarian cancer prognosis. Notably, our findings establish a strong association between the drug resistance of EPCs and oxidative phosphorylation pathways. Subsequently, through subpopulation and temporal trajectory analysis, we confirm the intermediate position of EPCs subpopulation C0. Furthermore, we delve into the immunological functions and differentially expressed genes associated with the prognosis of C0, shedding light on the potential for constructing novel ovarian cancer prognosis models and identifying new therapeutic targets.

## INTRODUCTION

Ovarian cancer has exhibited a rising incidence globally in recent years, ranking as the most common and highly aggressive malignancy among gynecological tumors [1, 2]. Due to the lack of distinctive early symptoms, early detection through non-invasive means is challenging, resulting in a diagnosis at an advanced stage in up to 70% of ovarian cancer patients [3, 4]. According to global cancer statistics from 2020, there were 313,959 newly diagnosed cases of ovarian cancer worldwide, with 207,252 ovarian cancer-related deaths reported [5]. BRCA1 and BRCA2 stand out as widely recognized genetic susceptibility genes for ovarian cancer. Mutations in BRCA genes escalate the hereditary risk of ovarian cancer. Studies have indicated that females with mutations in the BRCA1 gene face a 3 to 4 times higher risk of developing ovarian cancer compared to those with mutations in the BRCA2 gene

[6]. Like many cancer treatment modalities, surgery and chemotherapy are commonly employed in ovarian cancer management. However, the associated side effects and diminished quality of life often pose significant challenges for patients [7]. Furthermore, the high recurrence rates and development of drug resistance contribute to a 5-year survival rate of only approximately 47% for ovarian cancer patients [8]. Research has revealed that although most ovarian cancer patients initially respond to platinum-based chemotherapy, approximately 70-80% of patients eventually relapse and develop resistance, with the situation worsening over time [9–12]. In fact, the 5-year survival rate for advanced-stage high-grade serous ovarian cancer can be as low as 26% [13]. Presently, while neoadjuvant chemotherapy has emerged as a frontline treatment for certain patients, the impact of certain agents in neoadjuvant chemotherapy, such as bevacizumab, on the overall survival period of ovarian

cancer, requires further investigation [14]. Additionally, there is a tendency for elevated drug resistance and recurrence rates with certain neoadjuvant chemotherapy approaches [15]. Targeted therapies for ovarian cancer have also shown limited success [16]. Immunotherapy primarily aims to disrupt immune suppression and tolerance states by enhancing the body's immune recognition capabilities and immune-mediated tumor-killing abilities [17]. Some experts suggest that combining immunotherapy with PARP inhibitors and other treatment approaches can address the issue of tumor-infiltrating lymphocytes, but the effectiveness of such combinations still requires further research [18]. Due to the high heterogeneity of ovarian cancer, the development of immunotherapy has been relatively slow [19], and adverse treatment reactions have been reported intermittently [20]. In light of the diminished survival rates and heightened drug resistance observed in ovarian cancer recurrence, a thorough exploration of the mechanisms underpinning drug resistance in ovarian cancer becomes imperative. The search for novel therapeutic targets and immunotherapeutic strategies is crucial to enhance the efficacy of ovarian cancer treatment and to establish innovative prognostic models. In this study, we conducted a comprehensive investigation at the single-cell level to elucidate the mechanisms governing the extent of ovarian cancer's response to drugs. Employing a subpopulation approach to epithelial cells (EPCs), we delineated the cellular trajectories and immune functionalities within relevant subgroups. Based on these research findings, we postulate a strong correlation between ovarian cancer drug resistance and the oxidative phosphorylation pathway, substantiated by our empirical evidence. These studies contribute to a more profound understanding of the distinctions between drug resistance and sensitivity at the cellular level in ovarian cancer, with the aim of informing the design of superior treatment targets and prognostic models for ovarian cancer.

## **MATERIALS AND METHODS**

### **Data retrieval and processing**

Single-cell samples from five cases of ovarian cancer were procured via the National Center for Biotechnology Information (NCBI) Gene Expression Omnibus (GEO) database (<https://www.ncbi.nlm.nih.gov/geo/>). The GSE number is GSE154600. These samples were identified as GSM4675273, GSM4675274, GSM4675275, GSM4675276, and GSM4675277. Gene expression quantification data derived from RNA-Seq (HTSeq TPM) and clinical information pertaining to ovarian cancer were sourced from The Cancer Genome Atlas (TCGA) platform (<https://portal.gdc.cancer.gov/>). Subsequently, these datasets were subjected to rigorous

standardization procedures using the R software environment (version 4.3.0).

### **Data quality control**

Utilizing the R package DoubletFinder, we meticulously filtered and excluded data from samples containing doublets and subpar cells. The filtration criteria encompassed: total gene transcription counts (nCount) per cell falling within the range of 500 to 80,000. Total number of genes detected per cell (nFeature) within the range of 200 to 6,000. Mitochondrial gene proportions lower than 25%. Red blood cell gene count proportions less than 5%.

### **Dimension reduction, clustering, and annotation of data**

Subsequent to filtering, we imported the single-cell data and performed normalization using the NormalizeData function from the Seurat package in the R environment [21, 22]. The FindVariableFeatures function was employed to compute the variance of each gene, enabling the selection of the top 2000 highly variable genes based on both their dispersion and mean expression [23, 24]. We centralized all genes using the ScaleData function, calculated cell cycle effects using the CellCycleFeatures function, and conducted dimensionality reduction through PCA on the top 2000 highly variable genes. Further, to mitigate batch effects originating from different samples, the RunHarmony function from the harmony package within R was deployed. Clustering was executed using the FindNeighbors and FindClusters functions from the Seurat package. Cell annotations were performed by cross-referencing available literature, the CellMarker database (<http://bio-bigdata.hrbmu.edu.cn/CellMarker/>), and SingleR, focusing on different cellular clusters. Differential gene expression between clusters was assessed via the FindAllMarkers function, with the top 5 marker genes being showcased.

### **Drug resistance and staging analysis of entire cell population**

Drug sensitivity among distinct cellular clusters in ovarian cancer was visually represented using UMAP visualization. Relationships between drug sensitivity and the relative proportions of various clusters were explored. Furthermore, employing the Ro/e algorithm, cell abundance under different drug sensitivity conditions was quantified. Similarly, using the aforementioned methodologies, cell staging in ovarian cancer clusters was calculated, including abundance and inter-cluster proportion relationships. To delve deeper into the relationship between cellular

cluster staging and drug resistance, G2M and S phase scoring was computed for different ovarian cancer clusters, and their correlation with drug sensitivity was investigated.

### **Enrichment analysis of entire cell population**

Identification of differentially expressed genes (DEGs) between cellular clusters and other cell types was conducted. DEGs were considered significant if they were detected in at least 25% of cells with  $P < 0.01$ , a false discovery rate (FDR)  $< 0.05$ , and  $|\log_{2}FC| > 1$ . These DEGs were then subjected to Gene Ontology (GO) enrichment analysis. Furthermore, Gene Set Enrichment Analysis (GSEA) was performed, utilizing Kyoto Encyclopedia of Genes and Genomes (KEGG) databases (c2.cp.kegg.v7.5.1.symbols.gmt) to filter and analyze differentially expressed genes in Epithelial Cells (EPCs) compared to other clusters, with statistical significance defined as  $FDR < 0.05$ .

### **Metabolism analysis of entire cell population**

Employing the R package scMetabolism, we computed cellular metabolic pathways for different ovarian cancer clusters, stages, and drug resistance levels. The top 20 pathways were visually presented using a heatmap. We selected the top three pathways for in-depth exploration, investigating their expression patterns in UMAP representations and their associations with ovarian cancer clusters, drug sensitivity, and cell staging.

### **EPCs subpopulation trajectory analysis**

To investigate the transformation and evolution among subpopulations of EPCs, we conducted pseudo-time analysis. Using the R package Cytotrace, we predicted the relative differentiation status of each subpopulation of EPCs, with scores ranging from 0 to 1, where higher scores indicated a stronger cell stemness. Employing the R package monocle, we calculated the relative developmental time and sorted various subpopulations of EPCs accordingly. These cells were roughly categorized into three periods based on their sorting order. We explored the distribution of cell proportions among these three periods within each subpopulation of cells. Additionally, with respect to these three distinct states, we further investigated the temporal changes in cell cycle, subpopulation-specific genes, and marker genes. Genes were clustered into different groups based on their expression patterns over time, and we explored enriched pathways between these groups. Finally, we utilized slingshot to construct cell differentiation lineages and infer pseudo-time trajectories among different subpopulations of cells,

incorporating both cell clustering and spatial dimension information.

### **Gene and enrichment analysis of EPCs subpopulations**

We explored genes related to subpopulations, especially those associated with cell stemness, and their expression changes over time. The expression distributions of four stemness-related genes significantly differing from other groups were visualized using UMAP. We employed the pyscenic algorithm to compute the top five transcription factors for both C0 and C2 subpopulations, investigating their overall distribution and regulatory regions within subpopulations. Furthermore, we calculated differential gene expression among subpopulations and performed GO and KEGG enrichment analyses. We also conducted GSEA enrichment analysis specifically for the C0 subpopulation.

### **Clinical relevance and independent prognostic analysis of C0 subpopulation**

Using R software, we identified intersection genes between C0 subpopulation marker genes and ovarian cancer tumor tissues and normal tissues. Incomplete clinical data for ovarian cancer samples were removed, and the intersection genes were merged with standardized clinical data for ovarian cancer. Cox proportional hazards regression analysis, including single-variable analysis, was performed using the coxph function from the survival package. Subsequently, we validated the results using least absolute shrinkage and selection operator (LASSO)-penalized Cox regression and obtained prognostic differential genes through multivariate Cox hazard regression analysis. Risk scores were calculated for each sample, where  $\text{risk score} = \sum X\lambda$  (relative expression levels of prognostic-related genes) and  $\text{coef}\lambda$  (coefficients) [25, 26]. Samples were categorized into high- and low-risk groups based on the median risk score, and Principal Component Analysis (PCA) was used to assess their distributions. Heatmaps were generated to visualize the expression patterns of prognostic genes in high- and low-risk groups. Additionally, we computed coxef values for prognostic genes, demonstrated the differential survival outcomes between high- and low-risk groups using Kaplan-Meier curves, and evaluated the prognostic specificity and sensitivity through time-dependent receiver operating characteristic (ROC) curves [27, 28]. Correlation analysis between genes and risk scores was also conducted. We incorporated patient age and ethnicity data to construct a nomogram using the rms package to predict the prognosis of ovarian cancer patients. The prognostic model was validated using overall survival (OS) and ROC curves.

## Immunological correlation analysis of C0 subpopulation

We calculated TIDE scores and major immune checkpoint scores for high- and low-risk groups. Additionally, we leveraged xCell and CIBERSORT deconvolution algorithms to assess the immune infiltration status of patients in the high- and low-risk groups. Correlations between immune cells, risk scores, and self-expression were investigated, and the relationships between M1 and M2 macrophages, T cells, and risk scores were explored based on the results.

## Enrichment analysis of prognostic genes

Using the R package limma, we calculated differential genes between high- and low-risk groups with filtering criteria of  $|\log FC| > 1$  and FDR (BH) corrected threshold  $P_{adj} < 0.05$ . We conducted KEGG enrichment analyses and Gene Ontology (GO) enrichment analyses using the “clusterProfiler” R package, which encompassed biological processes, cellular components, and molecular functions [29, 30]. GSEA enrichment analysis was also performed for differential genes between high- and low-risk groups [31, 32].

## Availability of data and material

The data for this study come from the Gene Expression Omnibus (GEO) (<https://www.ncbi.nlm.nih.gov/geo/>) database and The Cancer Genome Atlas database (<https://portal.gdc.cancer.gov/>). The GEO accession is GSE154600. All the data in this paper support the results of this study.

## RESULTS

### Ovarian cancer cell subpopulation classification

We obtained single-cell data from five ovarian cancer patients from the GEO database (GSM4675273–GSM4675277). We used the R package DoubletFinder to remove doublets from the samples (Supplementary Figure 1A–1E) and further filtered out low-quality single-cell data through R software, resulting in a clean dataset (Supplementary Figure 1F). After the removal of doublets, the number of cells was 46436. After the removal of low-quality cells, the number of cells was 45191. We observed that cells of different stages were relatively concentrated in the PCA plot (Supplementary Figure 1G), suggesting that cell staging had a minimal overall impact on our results. Based on gene expression and dispersion, we selected the top 2000 highly variable genes (Supplementary Figure 1H) and performed dimensionality reduction using RunPCA, choosing the

top 30 dimensions for further analysis (Supplementary Figure 1I, 1J). We also explored the top ten highly variable genes for the first nine dimensions and presented them (Supplementary Figure 1K). Through clustering, we classified ovarian cancer cells into 27 clusters (Figure 1A) and further annotated them into eight major cell types using the R package singleR, Cellmarker database, and literature references (Figure 1B). These cell types included T\_NK cells (14671), Endothelial Cells (ECs 838), Pericytes (729), Fibroblasts (7462), Epithelial Cells (EPCs 9683), B Cells (B 1113), Plasma Cells (1832), and Myeloid Cells (8863). Different samples showed variations in the distribution of cell types, possibly due to individual sample sources and the tissue of origin for the tumor cells (Figure 1C). We identified the top 5 MARKER genes for each of the eight major cell types and visualized them, along with G2M.Score, S.Score, and tumor treatment response (Figure 1D). We found that EPCs exhibited significantly elevated G2M.Score and S.Score, and their MARKER genes were highly correlated with drug resistance. Literature review revealed that EPCs are the primary tumor cells in ovarian cancer tissues, piquing our interest.

### Tumor treatment response and cell staging of EPCs

Tumor treatment response can be categorized into three groups: Resistant, Refractory, and Sensitive. We studied the treatment response of various cell types in ovarian cancer tissues (Figure 2A) and found that the Resistant group was predominantly located within the EPCs cluster. Similarly, we observed that the G1 phase is a period after cell division and before DNA replication, the S phase is dedicated to DNA replication, and the G2M phase is the cell division preparation and mitotic phase. Abnormalities in these stages can lead to tumorigenesis. Combining cell staging with our findings, we noted that the G2M and S stages were significantly concentrated within the EPCs cluster (Figure 2B). To gain a more intuitive understanding of the distribution of treatment responses, we examined the proportions of different cell types in ovarian cancer (Figure 2C, 2G) and found that the Resistant group had the highest proportion of EPCs. Regarding tumor staging (Figure 2D, 2H), the proportion of EPCs in the G2M and S stages was significantly higher than in other cell types, while the G1 stage proportion was relatively lower. We also investigated the cell abundance of different cell groups in ovarian cancer, based on treatment response and cell cycle (Figure 2E, 2F). We observed that the Resistant group had the highest cell purity of EPCs. Similarly, in the G2M and S phases, the purity of EPCs was much higher than that of other types of ovarian cancer cells. This suggests that EPCs are



highly resistant to treatment and exhibit more vigorous cellular activity, and there may be some underlying connections between these characteristics. Furthermore, we validated our findings using G2M.Score and S.Score, which showed that EPCs had significantly higher scores compared to other cell types, with the

Resistant group exhibiting the highest scores among all groups (Figure 2I–2P). We also examined the number and types of DNA replications among different cell groups (Figure 2Q, 2R) and found that EPCs exhibited significantly higher scores. This might be related to the robust proliferative capacity of tumor cells.

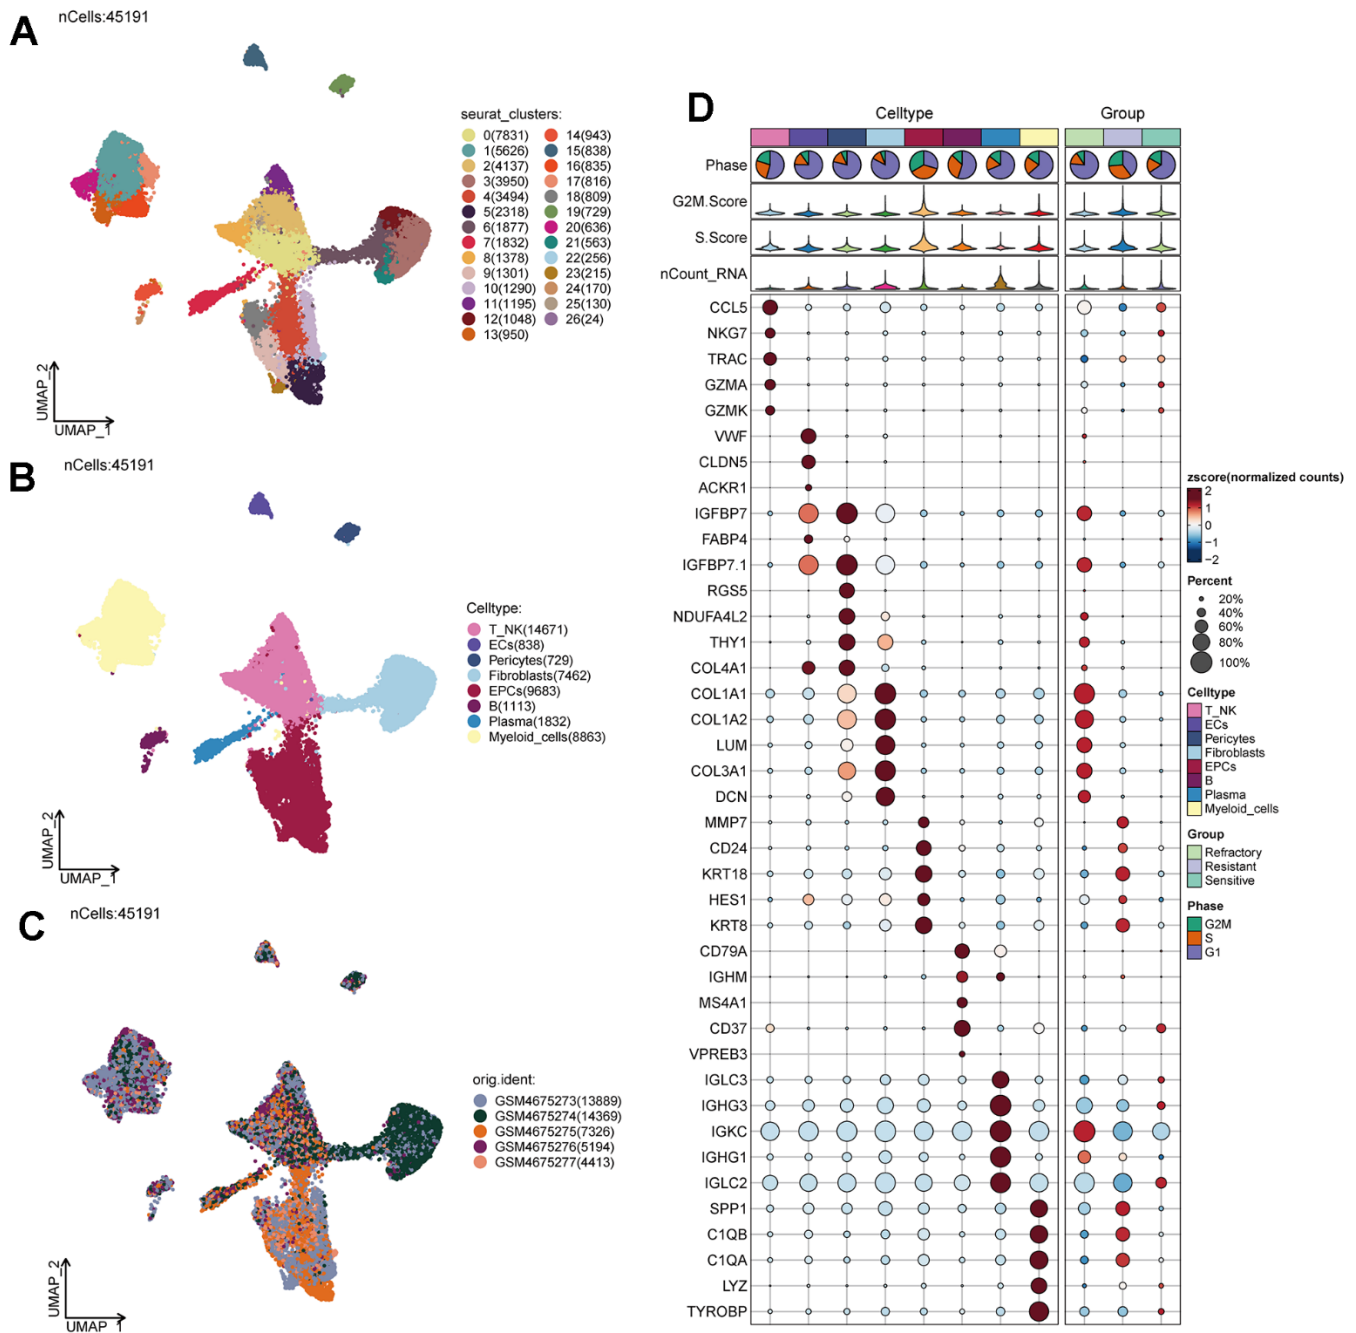

**Figure 1. Ovarian cancer cell cluster classification.** (A) A total of 28 clusters were identified after clustering 5 ovarian cancer patients. (B) Ovarian cancer cells were annotated into T\_NK, ECs, Pericytes, Fibroblasts, EPCs, B Cells, Plasma, and Myeloid Cells based on distinct MARKER genes. (C) Distribution of cells from 5 different samples. (D) Expression patterns of the top 5 MARKER genes in each major cell cluster.

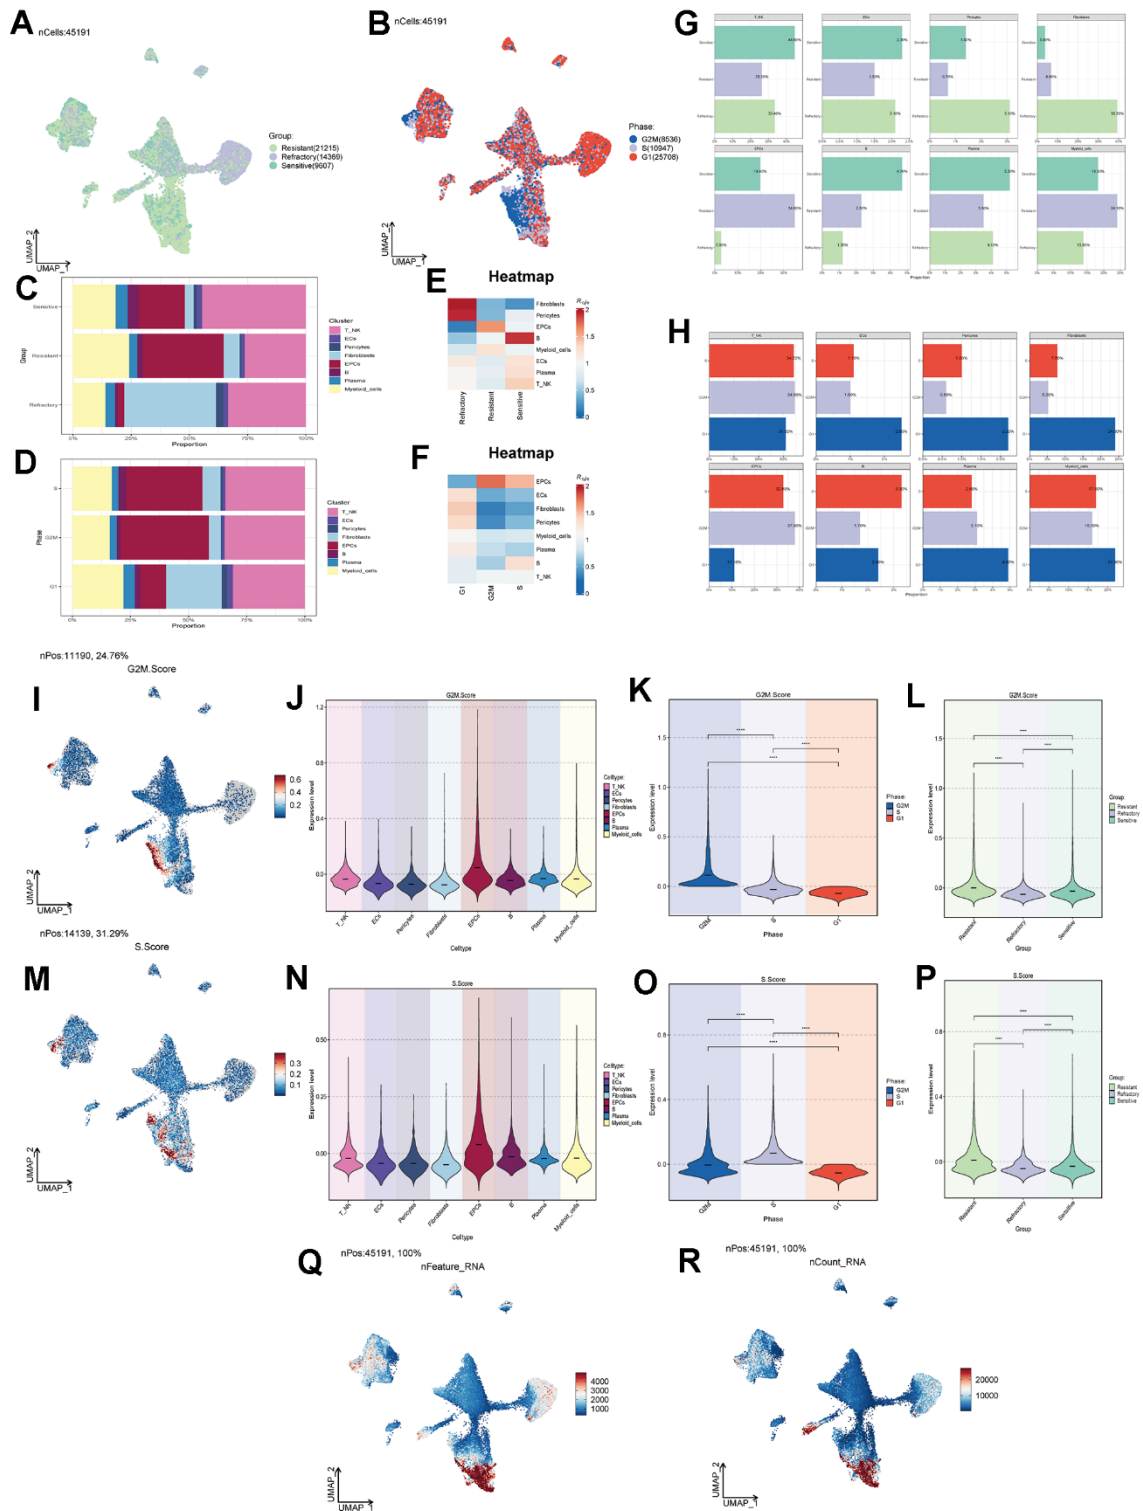

**Figure 2. Cell clustering by staging and drug treatment response level.** (A) Distribution of UNMP drug treatment response levels. (B) Distribution of UNMP cell staging within major cell clusters. (C) Proportion of major cell clusters within the Resistant, Refractory, and Sensitive response groups. (D) Proportion of major cell clusters within the G2M, S, and G1 cell staging phases. (E, F) Abundance of major cell clusters concerning drug response groups and cell staging. (G) Proportion of major cell clusters within the Resistant, Refractory, and Sensitive response groups and their facets were shown. (H) Proportion of major cell clusters within the G2M, S, and G1 cell staging phases and their facets were shown. (I) Distribution of UNMP G2M.Score. (J–L) Violin plots for G2M.Score in major ovarian cancer cell clusters, cell staging, and drug response. (M) Distribution of UNMP S.Score. (N–P) Violin plots for S.Score in major ovarian cancer cell clusters, cell staging, and drug response. (Q, R) Distribution of UNMP nFeature and nCount.

## Enrichment functional analysis of ovarian cancer cell subpopulations

We conducted differential gene expression analysis among various cell types in ovarian cancer tissues and presented the top 5 most significant genes (Figure 3A–3H). Using these differential genes, we performed GO enrichment functional analysis (Figure 3I) and found significant enrichment of pathways such as “Oxidative phosphorylation,” “Mitochondrial translation,” and “Aerobic respiration” in EPCs. Through GSEA enrichment functional analysis (Figure 3J–3S), we observed significant enrichment of pathways such as “Oxidative phosphorylation,” “Energy derivation by oxidation of organic compounds,” “Respiratory electron transport chain,” “Aerobic respiration,” and “Cellular respiration” in the high-expression group. In contrast, pathways including “T cell activation,” “Adaptive immune response,” “Inflammatory response,” “Positive regulation of the immune system process,” and “Antigen processing and presentation” were significantly enriched in the low-expression group. Oxygen-related pathways were prominently enriched in both GO and GSEA pathways. To further explore the underlying mechanisms, we conducted cellular metabolism analysis.

## Metabolism-related analysis of ovarian cancer cell subpopulations

Through cellular metabolism analysis (Figure 4A–4C), we found that Oxidative Phosphorylation, Glycolysis/Gluconeogenesis, and Pyruvate Metabolism scored significantly in various ovarian cancer cell subpopulations, treatment response levels, and cell staging. Among them, Oxidative Phosphorylation had a higher score in EPCs (Figure 4D–4G), suggesting that this metabolic pathway might be a key pathway in EPCs’ metabolism. The other two metabolic pathways, Glycolysis/Gluconeogenesis and Pyruvate Metabolism (Figure 4H–4O), scored higher not only in the EPCs group but also in the Resistant group and in cells in the G2M and S phases. We speculate that these two pathways may play a positive role in tumor progression.

## Subpopulations of EPCs

To further study the composition and functions of EPCs, we re-clustered EPCs into five subpopulations (C0–C4). Based on the calculation of each subpopulation’s CNV (Figure 5A), we labeled the C4 group with the lowest CNV as Low Malignant EPCs, and the C1, C2, and C3 groups with the highest CNV as High Malignant EPCs. The intermediate group, C0, was labeled as Moderate Malignant EPCs. We selected a signature gene for each subpopulation based

on the expression level and percentage of MARKER genes (Figure 5B). We also investigated the top 5 MARKER genes for each subpopulation, as well as their relationship with cell staging and treatment response levels (Figure 5C). We found that in EPCs, the expression of C0 subpopulation’s MARKER genes highly overlapped with the Sensitive group and was strongly correlated with G2M.Score and S.Score. This seemed contrary to the characteristics of the overall EPCs population being Resistant, which piqued our interest. We further explored the drug treatment response of each subpopulation (Figure 5D) and found that the C0 group exhibited higher drug sensitivity, while the C2 group showed higher drug resistance. Moreover, we observed the proportions of each subpopulation (Figure 5E, 5F), with C0 having the highest proportion of Sensitive cells, while C2 had the highest proportion of Resistant cells, and the C1 group showed a distribution between the two. Cell abundance calculations were consistent with these findings, with C0 having the highest purity in the Sensitive group, and C2 having the highest purity in the Resistant group (Figure 5K). We also calculated cell staging and proportions for each subpopulation (Figure 5G–5I) and found that in the cell cycle distribution, the G1 phase was most prevalent in C2, while the G2M and S phases were more common in C0 and C1 subpopulations. Cell abundance calculations corresponded to these results (Figure 5L). We further calculated G2M.Score, S.Score, nFeature, and nCount values for each subpopulation, finding that C0 and C1 subpopulations had higher proliferative activities (Figure 5J, 5M), while C2 had relatively higher metabolic activities (Figure 5N, 5O). We believe that C0 may represent a subpopulation of drug-sensitive cells within the overall Resistant EPCs population. In-depth exploration of the causes and mechanisms of drug sensitivity is crucial for ovarian cancer treatment.

## Pseudotime analysis of subpopulation cells

We predicted the differentiation status of each subpopulation using Cytotrace and found that the C2 group had the lowest differentiation, followed by C1 and C0 (Figure 6A, 6B). To understand the temporal relationships between subpopulation cells, we calculated the relative temporal order of each subpopulation using monocle (Figure 6C) and divided all subpopulations into three time stages: State1 as the initial stage, State2 as the intermediate stage, and State3 as the terminal stage (Figure 6D). We found that G1, G2M, and S stages were present in all three states (Figure 6E), but C2 was almost exclusively in State1, while C0 was more prevalent in State2 (Figure 6F). We speculate that the C2 group is at the starting point of the trajectory, while C0 is at the center of the trajectory and

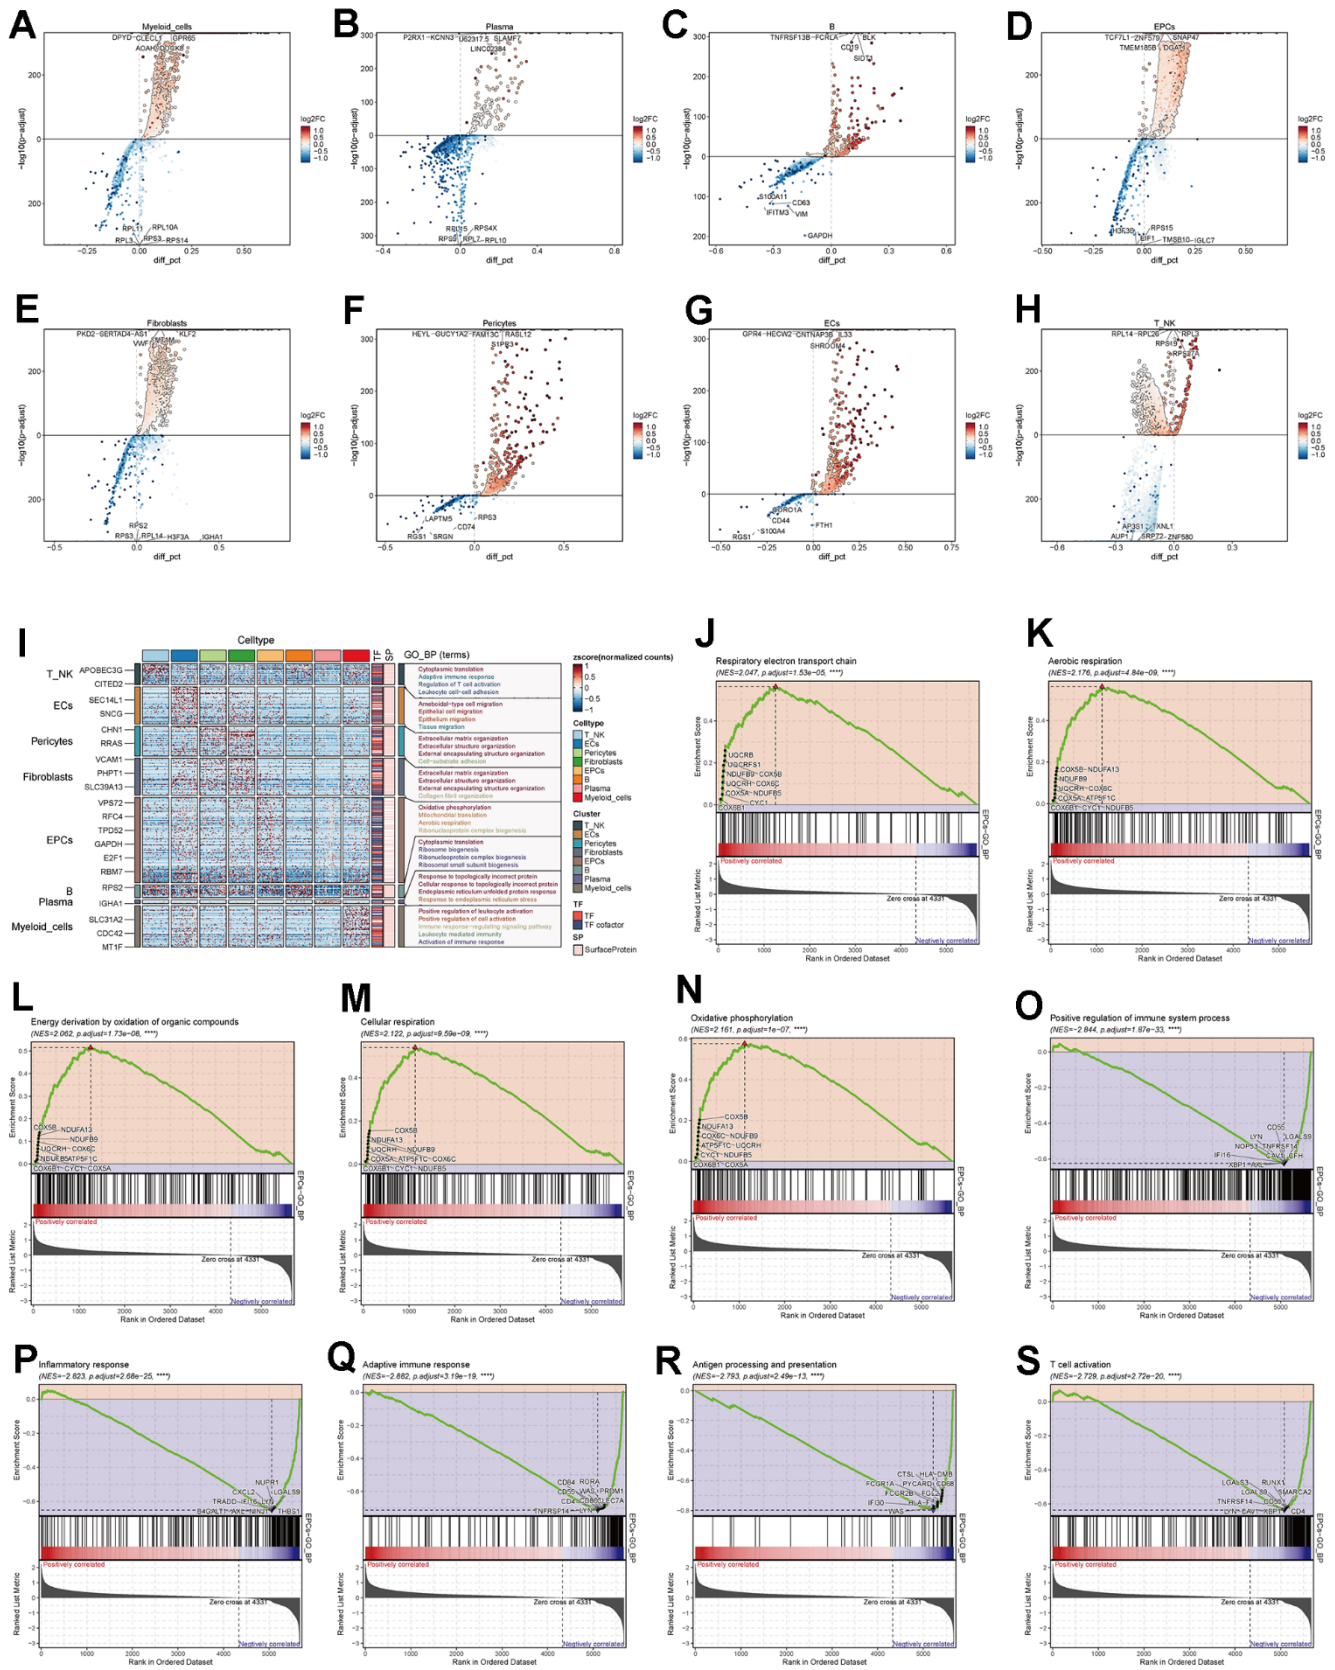

**Figure 3. Enrichment analysis of major cell clusters.** (A–H) Differential gene distribution in major ovarian cancer cell clusters compared to other cell types, displaying the top 5 upregulated and downregulated genes for each. (I) GO enrichment analysis for major cell clusters. (J–S) GSEA enrichment analysis for EPCs, displaying 5 pathways selected from both low and high expression groups.



progresses toward the surrounding subpopulations. We further validated the cell trajectory using slingshot and confirmed that C0 indeed occupies the intersection of the cellular trajectory (Figure 6G). This aligns with our previous research findings. Finally, we performed GO enrichment analysis based on the different gene expression order within each subpopulation and found that oxidative phosphorylation pathways were significantly enriched in the initial and intermediate stages, suggesting that this pathway plays a crucial

role in the regulation of drug response, leading to the development of drug resistance and sensitivity (Figure 6H).

### Functional analysis of subpopulation cells

We calculated the core genes and their expression changes over time in each subpopulation (Figure 7A, 7B). We observed that NES and KDM5B were significantly expressed in the C2 group and decreased

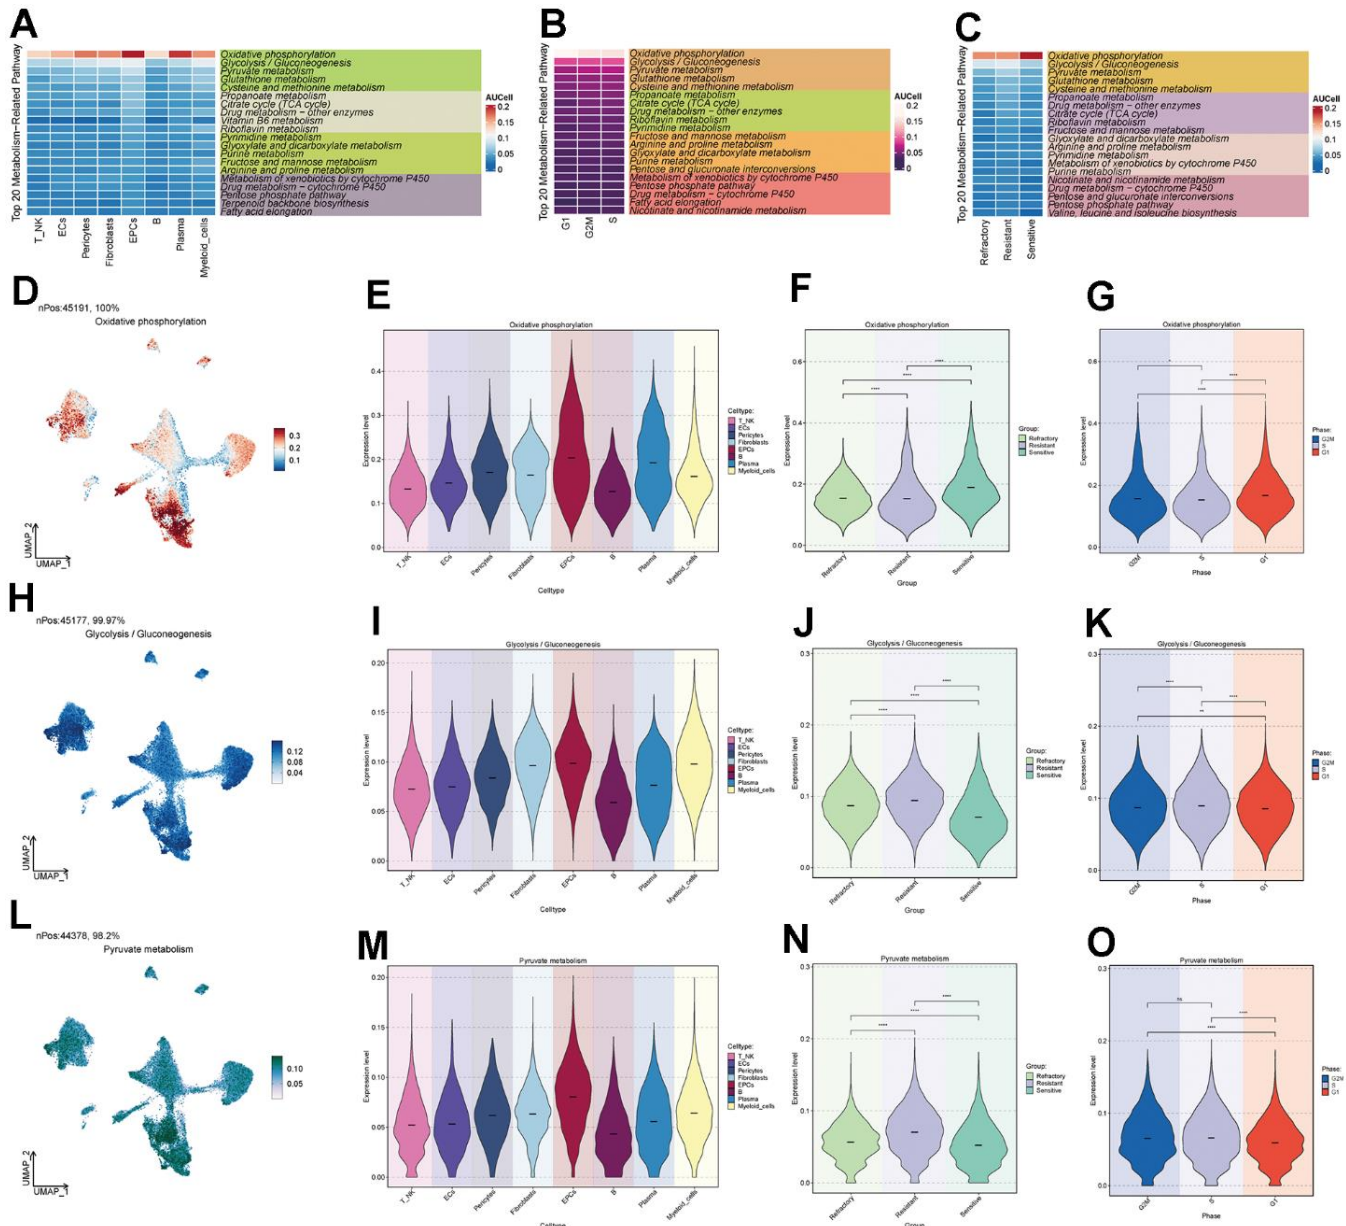

**Figure 4. Metabolic pathways of major cell clusters.** (A) Top 20 metabolic pathways in major ovarian cancer cell clusters. (B) Top 20 metabolic pathways in G2M, S, and G1 cell staging. (C) Top 20 metabolic pathways in the Resistant, Refractory, and Sensitive response groups. (D–O) UNMP distribution and violin plots for the Oxidative Phosphorylation, Glycolysis / Gluconeogenesis, and Pyruvate Metabolism pathways in major ovarian cancer cell clusters, cell staging, and drug response.

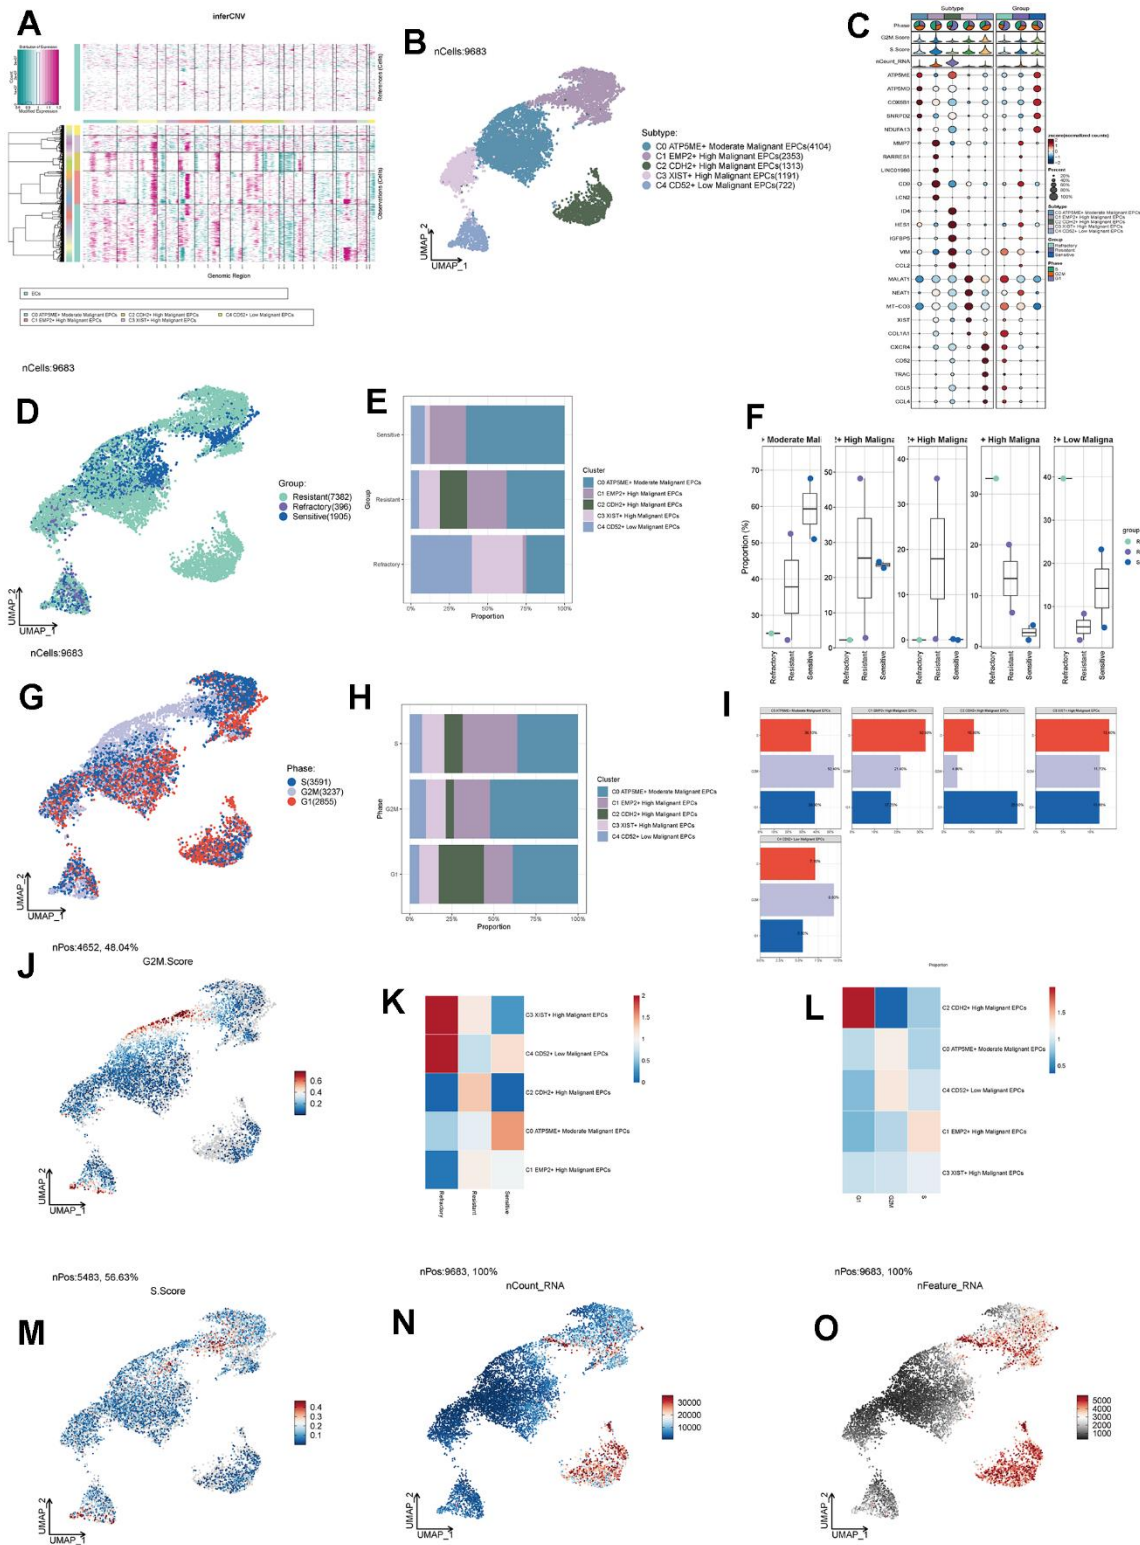

**Figure 5. Subgroup analysis of EPCs and related data.** (A) Heatmap showing CNV status of subgroup cells. (B) UNMP distribution of subgroup cells. (C) Expression patterns of the top 5 signature genes in each subgroup. (D) UNMP distribution of drug responses in subgroup cells. (E) Proportion of subgroup cells within the Resistant, Refractory, and Sensitive response groups and their facets were shown. (F) Proportion of subgroup cells within the Resistant, Refractory, and Sensitive response groups and their facets were shown. (G) UNMP distribution of cell staging in subgroup cells. (H) Proportion of subgroup cells within the G2M, S, and G1 cell staging phases. (I) Proportion of subgroup cells within the G2M, S, and G1 cell staging phases and their facets were shown. (J) UNMP distribution of G2M.Score. (K, L) Abundance of subgroup cells concerning drug response groups and cell staging. (M–O) UNMP distribution of S.Score, nFeature, and nCount.





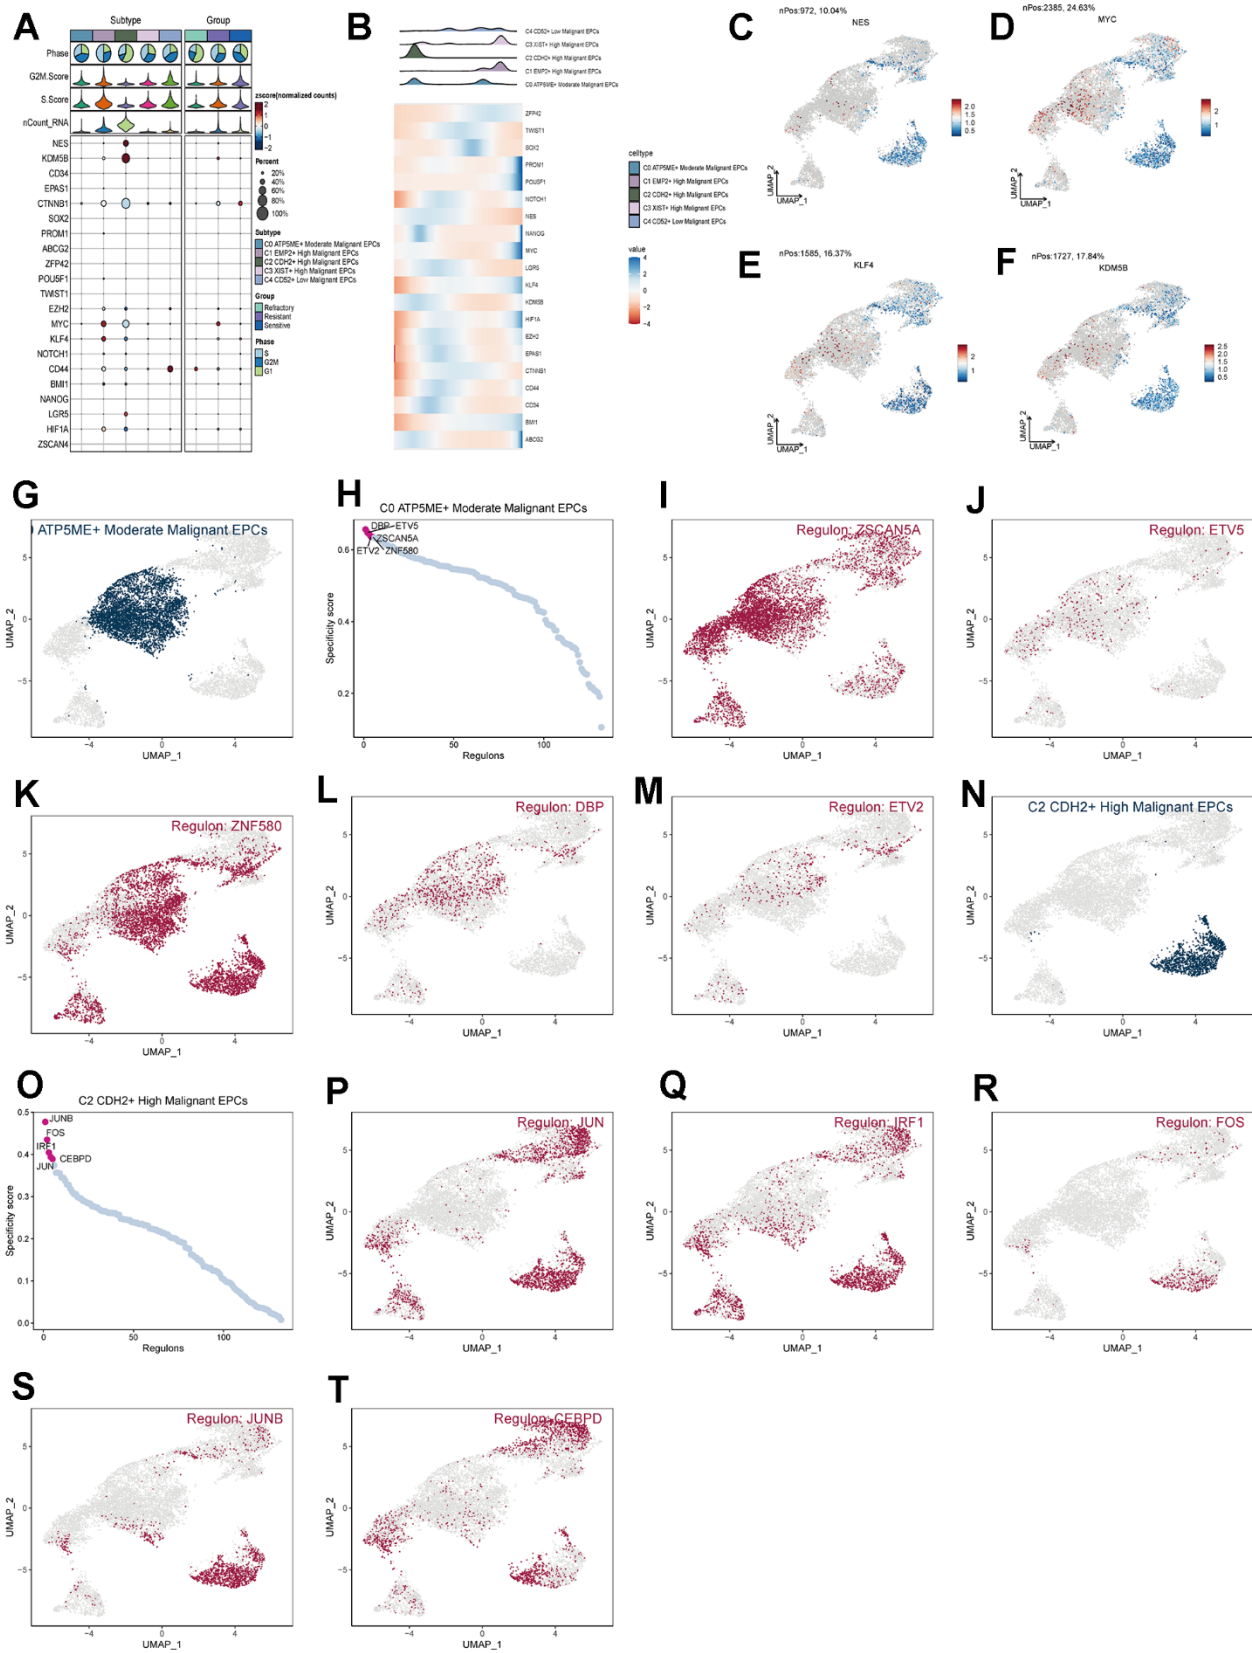

**Figure 7. Analysis of subgroup cell stemness genes and transcription factors.** (A) Expression patterns of stemness genes in various subgroups. (B) Temporal order of stemness gene expression in subgroup cells. (C–F) Distribution of NES, KDM5B, KLF4, and MYC gene UNMP expression. (D–T) Distribution of UNMP for the top five transcription factors in both C0 and C2 and their regulatory regions.



TCGA database and using univariate Cox regression analysis, we identified 7 genes related to prognosis (Figure 9A). We verified these genes using LASSO Cox regression analysis, which showed stable and good performance (Figure 9B, 9C). Finally, through multivariate Cox regression analysis, we determined 6 prognostic genes, where RPL21, RPL23A, and RPL23 were high-risk genes, while SNRPD1, TMA7, and UBL5 were low-risk genes. We calculated the risk scores for each sample and divided them into high and low-risk groups based on the median score (Figure 9D). We assessed the relationship between the high and low-risk groups in terms of survival status and survival time (Figure 9E) and found that as the risk score increased, the number of deceased patients became more concentrated. We further studied the expression of prognostic genes in the high and low-risk groups (Figure 9F) and examined the coefficient values of prognostic genes (Figure 9G). Among them, SNRPD1 had the lowest coefficient, while RPL23 had the highest. Kaplan-Meier curves (Figure 9H) showed that the high-risk group had lower survival rates at different time points, with  $p < 0.001$ , indicating meaningful results. The ROC curve results for 1-year, 3-year, and 5-year survival were 0.61, 0.58, and 0.63, respectively (Figure 9I), indicating stable and excellent predictive performance. We further explored the correlation between prognostic genes, risk scores, and OS (Figure 9J–9P). The results were consistent with our previous research. We also investigated the correlation between

different clinical factors and risk scores (Figure 10A, 10B) and constructed nomogram plots based on risk scores and clinical factors to predict the 1-year, 3-year, and 5-year survival rates of different patients (Figure 10C). We validated the accuracy of the 1-year, 3-year, and 5-year prognostic models (Figure 10D–10F). We also plotted ROC curves for each year's survival (Figure 10G), with AUC values of 0.64, 0.60, and 0.66 for 1-year, 3-year, and 5-year survival, respectively, indicating good sensitivity and specificity and excellent predictive value.

### Immune-related analysis and enrichment analysis

We calculated the TIDE scores and found that the high-risk group had higher scores (Figure 11A), indicating a higher likelihood of immune escape in high-risk group tumors. We screened immune checkpoint genes in the high and low-risk groups and found that TNFRSF14 and C10orf54 were significantly expressed in the low-risk group, while LAG3 was expressed at higher levels in the high-risk group (Figure 11B–11D). To further study the immune relevance of high and low-risk groups, we calculated immune cell infiltration (Figure 11E, 11F) and explored the relationships between risk scores, immune cells, and prognostic genes (Figure 11G, 11H). We found that M1 macrophages were negatively correlated with risk scores and RPL23, RPL21, while M2 macrophages were positively correlated with risk scores. Furthermore, T cells

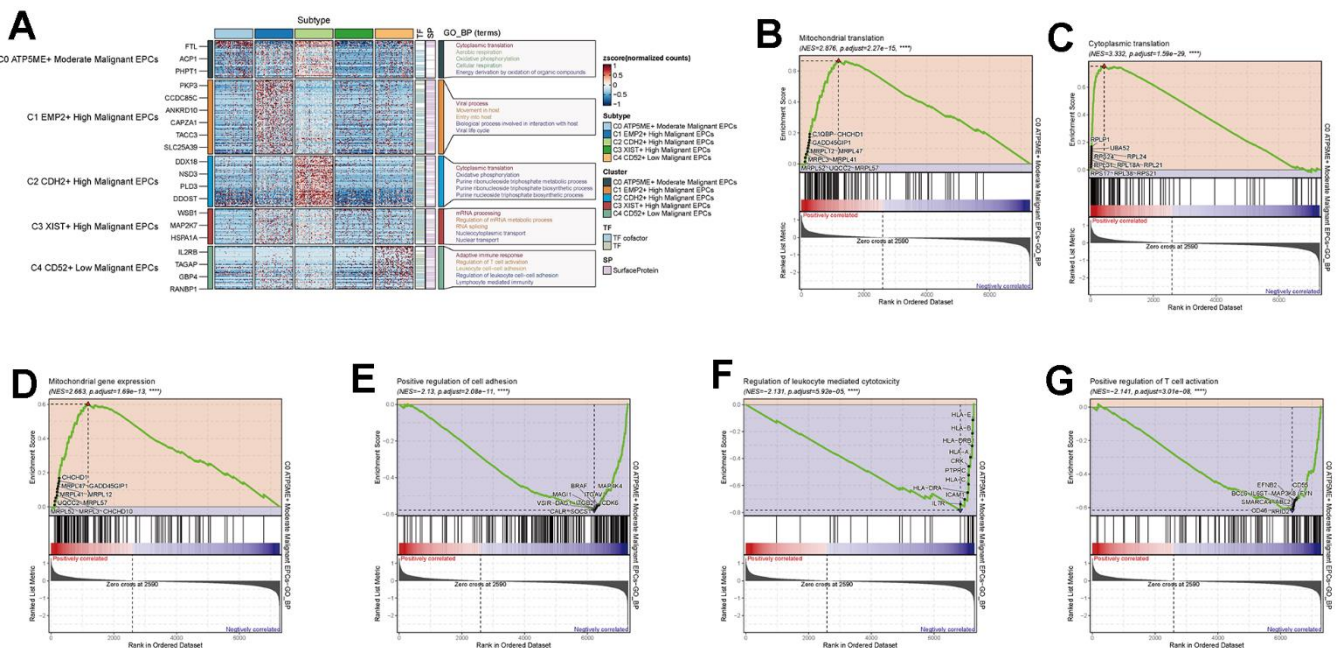

**Figure 8. Enrichment analysis of subgroup cells.** (A) GO enrichment analysis of subgroup cells. (B–G) GSEA enrichment analysis of C0 subgroup cells.

follicular helper exhibited strong correlations with SNRPD1 and risk scores. We hypothesized that M1 macrophages and T cells follicular helper were crucial for prognosis and immunotherapy, while M2 macrophages played an opposing role in this context. We also performed GO and KEGG enrichment analysis based on the differential genes between high and low-risk groups (Figure 12A, 12B) and found significant enrichment of pathways such as “Feeding Behavior” and “Neuropeptide Signaling Pathway” in GO, and

“Neuroactive Ligand–Receptor Interaction” and “Glycerolipid Metabolism” in KEGG.

## DISCUSSION

Ovarian cancer stands as one of the three most prevalent malignancies within the female reproductive system. According to data from the United States in 2020, newly diagnosed cases of ovarian cancer accounted for 2.4% of all new female cancer cases and contributed to

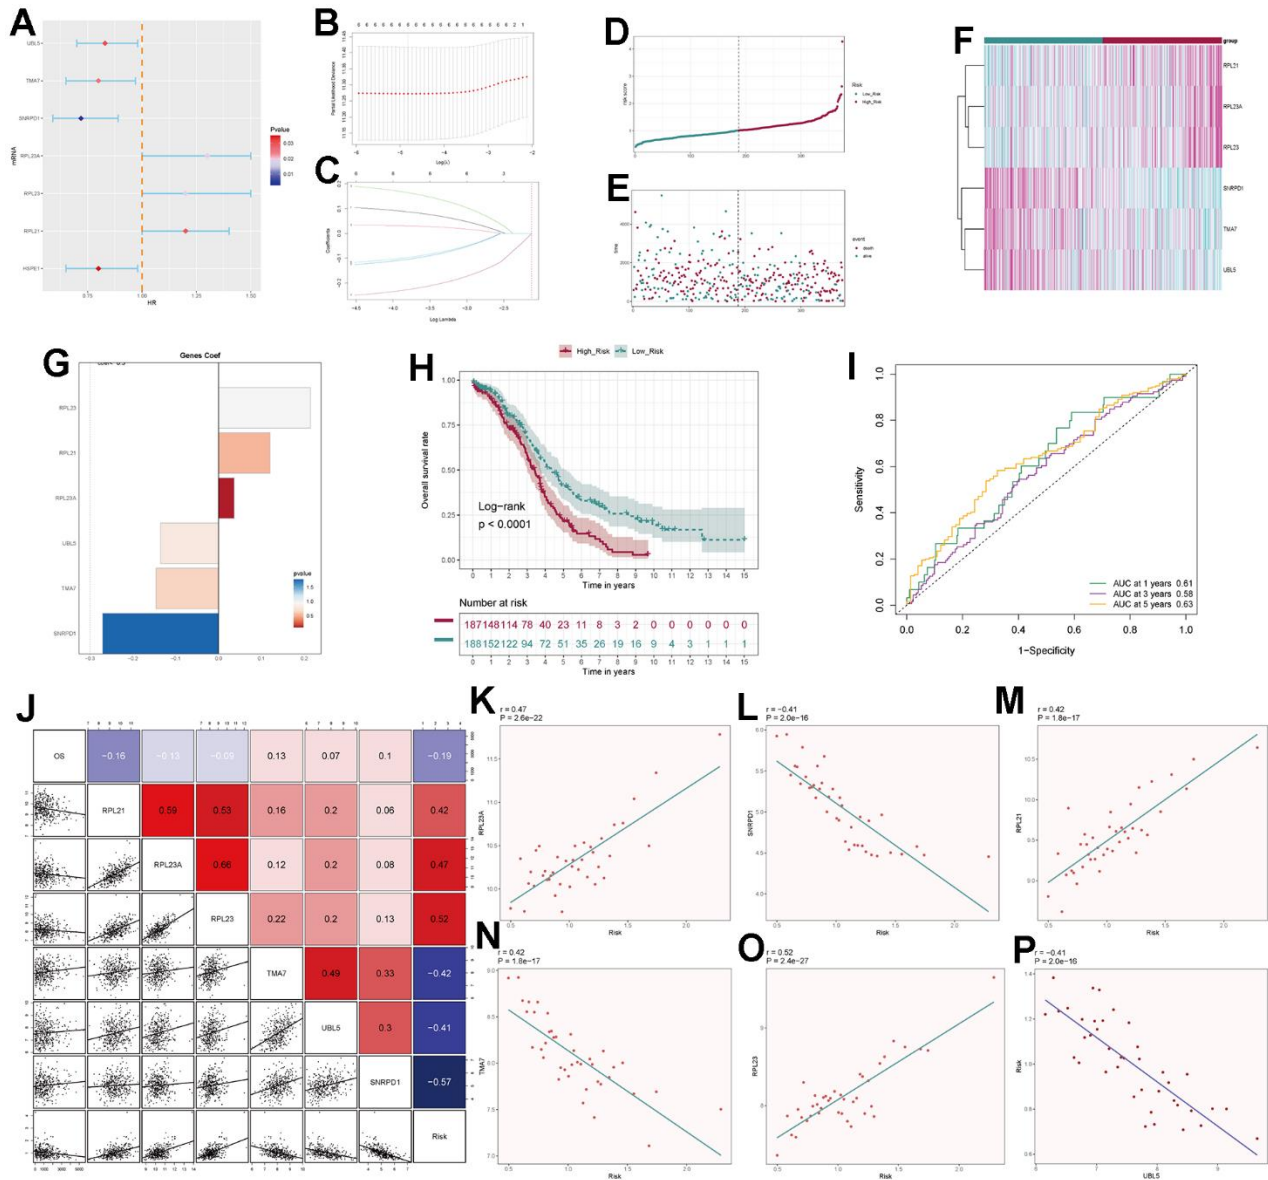

**Figure 9. Independent prognostic analysis.** (A) Seven differentially expressed genes associated with prognosis. (B) Distribution of LASSO analysis coefficient spectrum for six prognostic genes. (C) Parameter selection in the optimal cross-validation LASSO regression. (D) Patients categorized into high- and low-risk groups based on their risk scores. (E) Distribution of patients in the high- and low-risk groups. (F) Heatmap showing the distribution of prognosis-related genes. (G) Coef values of prognosis-related genes. (H) Kaplan-Meier survival analysis curves for high- and low-risk groups. (I) Time-dependent ROC curves with area under the curve (AUC) values of 0.61, 0.58, and 0.63 for 1-year, 3-year, and 5-year intervals. (J–P) Correlation analysis of genes with risk scores and overall survival (OS).

5% of female cancer-related mortalities [5]. The persistent challenge of platinum resistance and the consequent recurrence have consistently led to a low 5-year survival rate among ovarian cancer patients [33]. Presently, our understanding of the mechanisms governing tumor resistance and sensitivity remains relatively limited [34]. Hence, the pursuit of the underlying mechanisms that contribute to tumor responsiveness and resistance assumes paramount importance. In our study, we observed that the Oxidative Phosphorylation pathway scored notably high in both enrichment and metabolic analyses within the tumor core cells, specifically EPCs. This high score was also evident in the crucial subpopulation C0. We postulate that this pathway might be involved in the mechanisms of tumor drug resistance and certain other aspects of progression. Notably, this pathway exhibits a close association with EPC subtypes, particularly C0 and C2. Prior studies have underscored the pivotal role of oxidative phosphorylation in sustaining the vital processes of certain cancers [35–37]. It fulfills the tumor’s energy and metabolite requirements, thereby fostering its growth [38]. Remarkably in ovarian cancer, research has also identified the upregulation of gene activity in the oxidative phosphorylation pathway within ovarian cancer tumor cells that are involved in chemotherapy

resistance [39]. Moreover, the application of oxidative phosphorylation inhibitors has been found to effectively inhibit the progression of ovarian cancer [40]. Tang et al. observed that inhibiting the oxidative phosphorylation pathway with metformin resulted in a reduction in tumor growth and migration, accompanied by an increase in apoptosis [41]. Our research corroborates these findings by revealing a high correlation between the oxidative phosphorylation pathway and EPCs, a subset exhibiting the highest degree of resistance within the larger cell population.

Matassa and colleagues have similarly suggested the involvement of the oxidative phosphorylation pathway in ovarian cancer cell resistance, possibly mediated through TRAP1 [42]. Our investigations have additionally exposed disparities between subtypes C0 and C2, hinting that targeted intervention within the oxidative phosphorylation pathway may induce alterations in the proportions of EPC subtypes. This intervention could potentially prompt a transition from C2 to C0 and other subtypes, thereby ameliorating drug resistance in ovarian cancer tumor cells.

We have further discerned that the C0 EPC subtype exhibits a suppression of both immune infiltration and

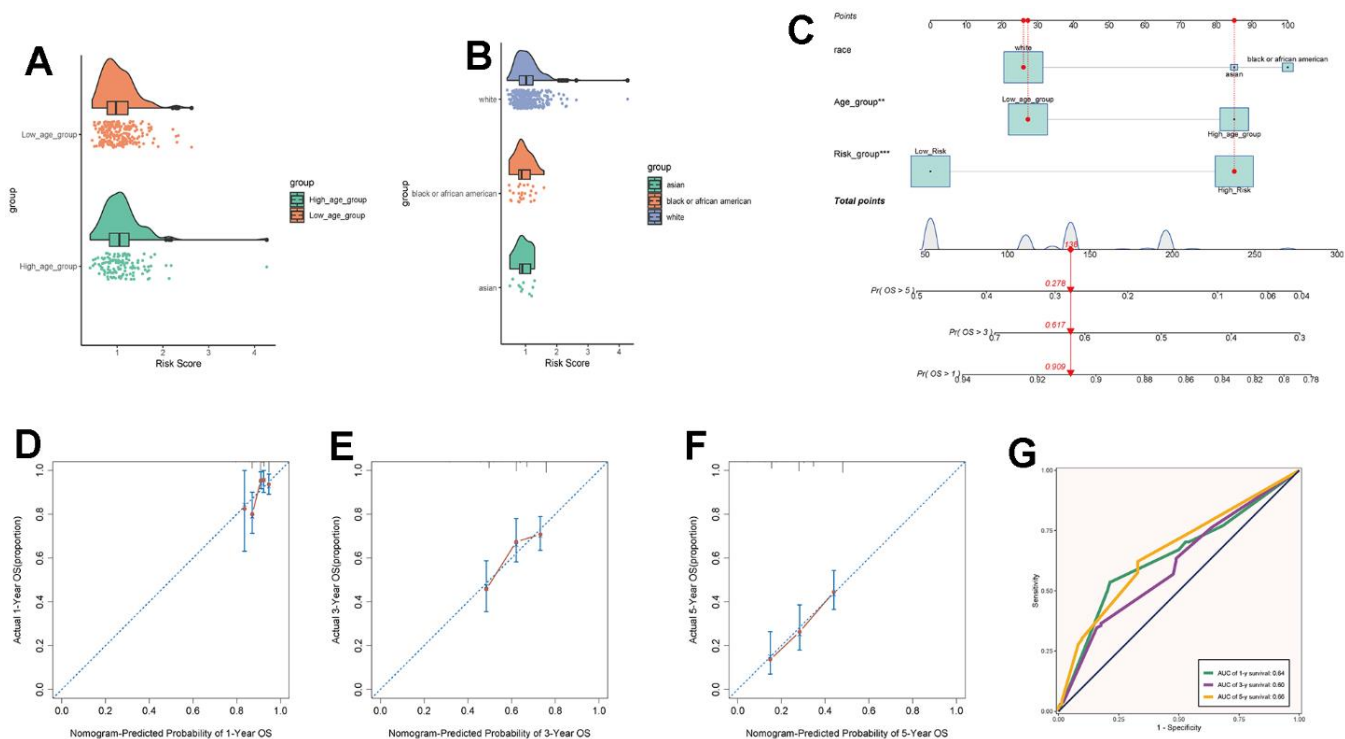

**Figure 10. Clinical relevance analysis.** (A, B) Analysis of the correlation between risk scores and age as well as ethnicity factors. (C) Survival curves for ovarian cancer patients at 1-year, 3-year, and 5-year intervals. (D–F) Nomo model charts for 1-year, 3-year, and 5-year OS tests. (G) Time-dependent ROC curve graphs with AUC values of 0.64, 0.60, and 0.66 for 1-year, 3-year, and 5-year intervals, respectively.



immune regulatory functions. Intriguingly, the correlation between macrophages M1 and M2 and risk scores runs contrary to expectations. Tumor-associated macrophages (TAMs) constitute a crucial component of the tumor microenvironment, infiltrating to levels exceeding 50%. They play a significant regulatory role in angiogenesis, tumor growth, and metastasis [43, 44]. TAMs can be specifically categorized into M1 and M2 macrophages. In the early stages of tumor development, TAMs exhibit a pro-inflammatory phenotype similar to M1, suppressing the immune response against tumor growth. As the tumor progresses, the hypoxic conditions within the tumor microenvironment gradually induce the transformation of TAMs towards an M2-like phenotype, promoting their involvement in immune escape and angiogenesis of tumor cells [45–48]. Therefore, M1 macrophages

have the ability to inhibit the progression of tumors, while M2 macrophages are positively correlated with tumor advancement [49, 50]. Moreover, Kuo et al. have identified that the activation of oxidative-related pathways often results in the suppression of the immune functionality within the tumor microenvironment. This activation further induces the generation of reactive oxygen species (ROS), subsequently promoting the polarization of macrophages from the M1 to M2 phenotype. This, in turn, facilitates tumor growth and progression, exerting an adverse impact on patient prognosis [51, 52]. The activation of ROS is often accompanied by increased angiogenesis and the suppression of immune microenvironment functions. This further enhances the production of macrophage-derived interferon (IFN) and interleukin-6 (IL-6), thereby inhibiting immune

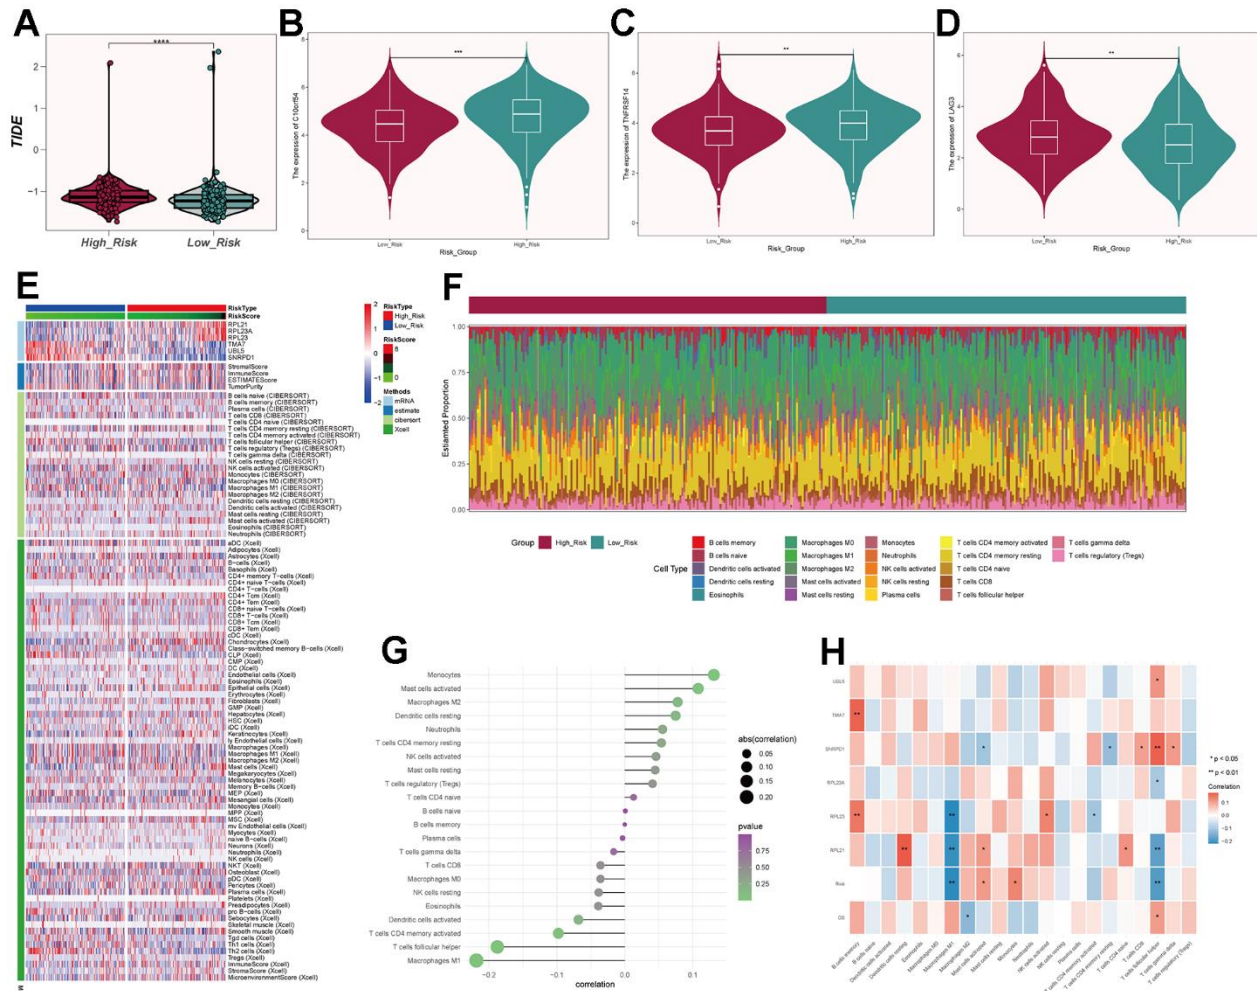

**Figure 11. Immune-related analysis of C0 subgroup.** (A) Violin plot of TIDE scores for high- and low-risk groups. (B–D) Immune checkpoint scores for high- and low-risk groups. (E) Heatmap showing differences in predictive genes, tumor microenvironment, and immune cells between high- and low-risk groups. (F) Proportion of immune cells in high- and low-risk groups. (G) Correlation between immune cells and risk scores. (H) Correlation between immune cells, prognosis-related genes, risk scores, and overall survival (OS).



responses within the tumor microenvironment [53, 54]. The oxidative-related pathways exhibit significant scores in both EPCs and the C0 subpopulation. Additionally, there is a notable negative correlation between the oxidative-related pathway scores and the GSEA immune pathway scores in C0. Consequently, we hypothesize that oxidative-related pathways play a crucial role in tumor progression, possibly establishing close associations with drug resistance and immune suppression. Mouton's research has similarly established the dependence of M2 macrophages on the tricarboxylic acid cycle and oxidative phosphorylation [55]. Consequently, we hypothesize that by modulating oxidative phosphorylation, not only can ovarian cancer cell resistance be improved, but the immune suppression within the tumor microenvironment can also be alleviated.

Ultimately, we have identified six prognostically relevant genes, with RPL23 exhibiting the highest coefficient value. RPL23, a ribosomal protein responsible for translating mRNA into proteins, has been implicated in cancer progression across various cancer types, including lung cancer, colorectal cancer, and hepatocellular carcinoma [56–58]. It has also been associated with increased drug resistance, promoting multidrug resistance in gastric cancer cells by inhibiting drug-induced apoptosis [59, 60]. We postulate that RPL23 plays a positive role in ovarian cancer progression, potentially linked to immune function and oxidative phosphorylation. However,

further experimental validation is warranted. Kang and colleagues have also identified RPL23's role in promoting ovarian cancer cell progression, suggesting that its high expression may facilitate ovarian cancer recurrence, aligning with our research findings [61].

Notably, the absence of integrated omics data, including metabolomics, ATAC-seq, or proteomics, represents a noteworthy deficiency in the current analysis. This limitation underscores the need for future research endeavors that encompass a more comprehensive multi-omics approach to enhance the depth and validity of our findings.

## CONCLUSIONS

In this study, we conducted a systematic exploration of single-cell data from ovarian cancer tissues, providing insights into the resistance mechanisms within EPCs and their association with the Oxidative Phosphorylation pathway. We further performed temporal trajectory analysis of various EPCs subtypes, highlighting the pivotal role of the central C0 subtype in immune cell functionality and correlation. Additionally, we constructed a prognostic model relevant to ovarian cancer, emphasizing the potential significance of the high-risk gene RPL23 and the Oxidative Phosphorylation pathway as crucial targets for ovarian cancer treatment and drug resistance. In conclusion, our discoveries unveil novel mechanisms related to drug resistance in ovarian cancer, paving the

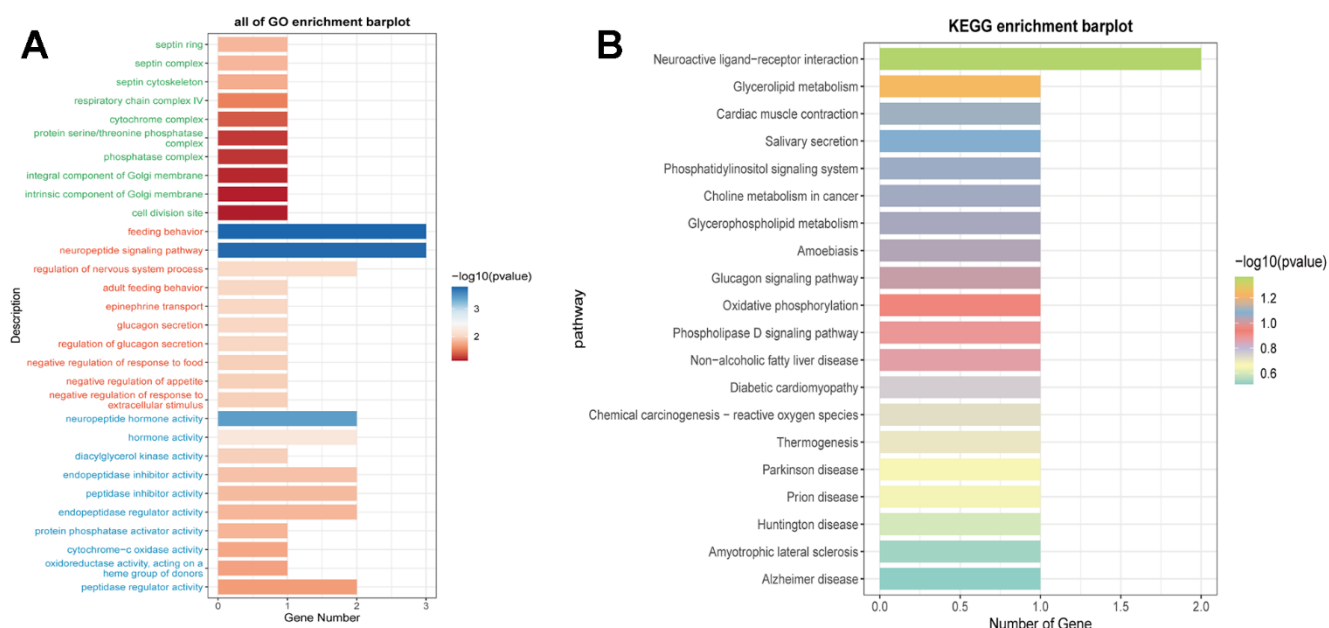

**Figure 12. Enrichment analysis of prognostic genes.** (A) Functional enrichment analysis of prognostic genes using GO terms. (B) Functional enrichment analysis of prognostic genes using KEGG pathways.

way for subsequent research. They also suggest another potential direction for targeting in ovarian cancer treatment and contribute to the construction of a new and effective prognostic model.

## AUTHOR CONTRIBUTIONS

Conceptualization, Pengfei Liu and Jinbao Liu; Data curation, Pengfei Liu and Jinbao Liu; Formal analysis, Pengfei Liu and Jinxing Liu; Funding acquisition, Xiao Yu; Investigation, Pengfei Liu and Jinbao Liu; Methodology, Pengfei Liu, Jinbao Liu and Jinxing Liu; Project administration, Pengfei Liu and Jinbao Liu; Resources, Pengfei Liu and Jinbao Liu; Software, Pengfei Liu, Jinbao Liu and Xiao Yu; Supervision, Xiao Yu; Writing – original draft, Pengfei Liu and Jinbao Liu; Writing – review and editing, Pengfei Liu, Jinbao Liu, Jinxing Liu and Xiao Yu.

## ACKNOWLEDGMENTS

Thanks to everyone who have contributed to this article.

## CONFLICTS OF INTEREST

The authors declare that the research is conducted in the absence of any commercial or financial relationships that could be construed as a potential conflict of interest.

## FUNDING

This work was supported by the National Natural Science Foundation of China (82104917); the Natural Science Foundation of Shandong Province (ZR2021MH079).

## REFERENCES

1. Siegel RL, Miller KD, Jemal A. Cancer statistics, 2019. *CA Cancer J Clin.* 2019; 69:7–34. <https://doi.org/10.3322/caac.21551> PMID:30620402
2. Vergote I, Gonzalez-Martin A, Lorusso D, Gourley C, Mirza MR, Kurtz JE, Okamoto A, Moore K, Kridelka F, McNeish I, Reuss A, Votan B, du Bois A, et al, and participants of the 6th Gynecologic Cancer InterGroup (GCIg) Ovarian Cancer Consensus Conference on Clinical Research. Clinical research in ovarian cancer: consensus recommendations from the Gynecologic Cancer InterGroup. *Lancet Oncol.* 2022; 23:e374–84. [https://doi.org/10.1016/S1470-2045\(22\)00139-5](https://doi.org/10.1016/S1470-2045(22)00139-5) PMID:35901833
3. Xia C, Dong X, Li H, Cao M, Sun D, He S, Yang F, Yan X, Zhang S, Li N, Chen W. Cancer statistics in China and United States, 2022: profiles, trends, and determinants. *Chin Med J (Engl).* 2022; 135:584–90.

- <https://doi.org/10.1097/CM9.0000000000002108> PMID:35143424
4. He C, Huang F, Zhang K, Wei J, Hu K, Liang M. Establishment and validation of an RNA binding protein-associated prognostic model for ovarian cancer. *J Ovarian Res.* 2021; 14:27. <https://doi.org/10.1186/s13048-021-00777-1> PMID:33550985
5. Sung H, Ferlay J, Siegel RL, Laversanne M, Soerjomataram I, Jemal A, Bray F. Global Cancer Statistics 2020: GLOBOCAN Estimates of Incidence and Mortality Worldwide for 36 Cancers in 185 Countries. *CA Cancer J Clin.* 2021; 71:209–49. <https://doi.org/10.3322/caac.21660> PMID:33538338
6. Casey MJ, Bewtra C. Peritoneal carcinoma in women with genetic susceptibility: implications for Jewish populations. *Fam Cancer.* 2004; 3:265–81. <https://doi.org/10.1007/s10689-004-9554-y> PMID:15516851
7. Elies A, Rivière S, Pouget N, Becette V, Dubot C, Donnadieu A, Rouzier R, Bonneau C. The role of neoadjuvant chemotherapy in ovarian cancer. *Expert Rev Anticancer Ther.* 2018; 18:555–66. <https://doi.org/10.1080/14737140.2018.1458614> PMID:29633903
8. Siegel RL, Miller KD, Jemal A. Cancer statistics, 2020. *CA Cancer J Clin.* 2020; 70:7–30. <https://doi.org/10.3322/caac.21590> PMID:31912902
9. Asare-Werehene M, Nakka K, Reunov A, Chiu CT, Lee WT, Abedini MR, Wang PW, Shieh DB, Dilworth FJ, Carmona E, Le T, Mes-Masson AM, Burger D, Tsang BK. The exosome-mediated autocrine and paracrine actions of plasma gelsolin in ovarian cancer chemoresistance. *Oncogene.* 2020; 39:1600–16. <https://doi.org/10.1038/s41388-019-1087-9> PMID:31700155
10. Markman M, Rothman R, Hakes T, Reichman B, Hoskins W, Rubin S, Jones W, Almadrones L, Lewis JL Jr. Second-line platinum therapy in patients with ovarian cancer previously treated with cisplatin. *J Clin Oncol.* 1991; 9:389–93. <https://doi.org/10.1200/JCO.1991.9.3.389> PMID:1999708
11. Balbi G, Di Prisco L, Musone R, Menditto A, Cassese E, Balbi C, Cardone A. Second-line with paclitaxel and carboplatin for recurrent disease following first paclitaxel and platinum compounds in ovarian carcinoma. *Eur J Gynaecol Oncol.* 2002; 23:347–9. PMID:12214742
12. Hoekstra AV, Hurteau JA, Kirschner CV, Rodriguez GC. The combination of monthly carboplatin and weekly paclitaxel is highly active for the treatment of recurrent

- ovarian cancer. *Gynecol Oncol.* 2009; 115:377–81.  
<https://doi.org/10.1016/j.ygyno.2009.08.021>  
PMID:[19800107](https://pubmed.ncbi.nlm.nih.gov/19800107/)
13. Rose PG, Fusco N, Fluellen L, Rodriguez M. Second-line therapy with paclitaxel and carboplatin for recurrent disease following first-line therapy with paclitaxel and platinum in ovarian or peritoneal carcinoma. *J Clin Oncol.* 1998; 16:1494–7.  
<https://doi.org/10.1200/JCO.1998.16.4.1494>  
PMID:[9552057](https://pubmed.ncbi.nlm.nih.gov/9552057/)
  14. Kang S. Neoadjuvant chemotherapy for ovarian cancer: do we have enough evidence? *Lancet.* 2015; 386:223–4.  
[https://doi.org/10.1016/S0140-6736\(14\)62259-5](https://doi.org/10.1016/S0140-6736(14)62259-5)  
PMID:[26002110](https://pubmed.ncbi.nlm.nih.gov/26002110/)
  15. Gao Y, Li Y, Zhang C, Han J, Liang H, Zhang K, Guo H. Evaluating the benefits of neoadjuvant chemotherapy for advanced epithelial ovarian cancer: a retrospective study. *J Ovarian Res.* 2019; 12:85.  
<https://doi.org/10.1186/s13048-019-0562-9>  
PMID:[31519183](https://pubmed.ncbi.nlm.nih.gov/31519183/)
  16. Tian W, Lei N, Zhou J, Chen M, Guo R, Qin B, Li Y, Chang L. Extracellular vesicles in ovarian cancer chemoresistance, metastasis, and immune evasion. *Cell Death Dis.* 2022; 13:64.  
<https://doi.org/10.1038/s41419-022-04510-8>  
PMID:[35042862](https://pubmed.ncbi.nlm.nih.gov/35042862/)
  17. Hardwick N, Frankel PH, Cristea M. New Approaches for Immune Directed Treatment for Ovarian Cancer. *Curr Treat Options Oncol.* 2016; 17:14.  
<https://doi.org/10.1007/s11864-016-0389-1>  
PMID:[26942589](https://pubmed.ncbi.nlm.nih.gov/26942589/)
  18. Chu YY, Yam C, Yamaguchi H, Hung MC. Biomarkers beyond BRCA: promising combinatorial treatment strategies in overcoming resistance to PARP inhibitors. *J Biomed Sci.* 2022; 29:86.  
<https://doi.org/10.1186/s12929-022-00870-7>  
PMID:[36284291](https://pubmed.ncbi.nlm.nih.gov/36284291/)
  19. Lheureux S, Braunstein M, Oza AM. Epithelial ovarian cancer: Evolution of management in the era of precision medicine. *CA Cancer J Clin.* 2019; 69:280–304.  
<https://doi.org/10.3322/caac.21559>  
PMID:[31099893](https://pubmed.ncbi.nlm.nih.gov/31099893/)
  20. Kumar V, Chaudhary N, Garg M, Floudas CS, Soni P, Chandra AB. Current Diagnosis and Management of Immune Related Adverse Events (irAEs) Induced by Immune Checkpoint Inhibitor Therapy. *Front Pharmacol.* 2017; 8:49.  
<https://doi.org/10.3389/fphar.2017.00049>  
PMID:[28228726](https://pubmed.ncbi.nlm.nih.gov/28228726/)
  21. Ding Y, Zhao Z, Cai H, Zhou Y, Chen H, Bai Y, Liu Z, Liu S, Zhou W. Single-cell sequencing analysis related to sphingolipid metabolism guides immunotherapy and prognosis of skin cutaneous melanoma. *Front Immunol.* 2023; 14:1304466.  
<https://doi.org/10.3389/fimmu.2023.1304466>  
PMID:[38077400](https://pubmed.ncbi.nlm.nih.gov/38077400/)
  22. Ge Q, Zhao Z, Li X, Yang F, Zhang M, Hao Z, Liang C, Meng J. Deciphering the suppressive immune microenvironment of prostate cancer based on CD4+ regulatory T cells: Implications for prognosis and therapy prediction. *Clin Transl Med.* 2024; 14:e1552.  
<https://doi.org/10.1002/ctm2.1552> PMID:[38239097](https://pubmed.ncbi.nlm.nih.gov/38239097/)
  23. Zhao Z, Ding Y, Tran LJ, Chai G, Lin L. Innovative breakthroughs facilitated by single-cell multi-omics: manipulating natural killer cell functionality correlates with a novel subcategory of melanoma cells. *Front Immunol.* 2023; 14:1196892.  
<https://doi.org/10.3389/fimmu.2023.1196892>  
PMID:[37435067](https://pubmed.ncbi.nlm.nih.gov/37435067/)
  24. Lin Z, Sui X, Jiao W, Chen C, Zhang X, Zhao J. Mechanism investigation and experiment validation of capsaicin on uterine corpus endometrial carcinoma. *Front Pharmacol.* 2022; 13:953874.  
<https://doi.org/10.3389/fphar.2022.953874>  
PMID:[36210802](https://pubmed.ncbi.nlm.nih.gov/36210802/)
  25. Lin Z, Fan W, Sui X, Wang J, Zhao J. Necroptosis-Related LncRNA Signatures for Prognostic Prediction in Uterine Corpora Endometrial Cancer. *Reprod Sci.* 2023; 30:576–89.  
<https://doi.org/10.1007/s43032-022-01023-9>  
PMID:[35854199](https://pubmed.ncbi.nlm.nih.gov/35854199/)
  26. Zou J, Lin Z, Jiao W, Chen J, Lin L, Zhang F, Zhang X, Zhao J. A multi-omics-based investigation of the prognostic and immunological impact of necroptosis-related mRNA in patients with cervical squamous carcinoma and adenocarcinoma. *Sci Rep.* 2022; 12:16773.  
<https://doi.org/10.1038/s41598-022-20566-0>  
PMID:[36202899](https://pubmed.ncbi.nlm.nih.gov/36202899/)
  27. Lin Z, Sui X, Jiao W, Wang Y, Zhao J. Exploring the mechanism and experimental verification of puerarin in the treatment of endometrial carcinoma based on network pharmacology and bioinformatics analysis. *BMC Complement Med Ther.* 2022; 22:150.  
<https://doi.org/10.1186/s12906-022-03623-z>  
PMID:[35672846](https://pubmed.ncbi.nlm.nih.gov/35672846/)
  28. Wang Y, Zhao ZJ, Kang XR, Bian T, Shen ZM, Jiang Y, Sun B, Hu HB, Chen YS. lncRNA DLEU2 acts as a miR-181a sponge to regulate SEPP1 and inhibit skeletal muscle differentiation and regeneration. *Aging (Albany NY).* 2020; 12:24033–56.  
<https://doi.org/10.18632/aging.104095>  
PMID:[33221762](https://pubmed.ncbi.nlm.nih.gov/33221762/)

29. Zhao J, Jiao W, Sui X, Zou J, Wang J, Lin Z. Construction of a prognostic model of luteolin for endometrial carcinoma. *Am J Transl Res.* 2023; 15:2122–39. PMID:[37056832](https://pubmed.ncbi.nlm.nih.gov/37056832/)
30. Zhao ZJ, Zheng RZ, Wang XJ, Li TQ, Dong XH, Zhao CY, Li XY. Integrating Lipidomics and Transcriptomics Reveals the Crosstalk Between Oxidative Stress and Neuroinflammation in Central Nervous System Demyelination. *Front Aging Neurosci.* 2022; 14:870957. <https://doi.org/10.3389/fnagi.2022.870957> PMID:[35547618](https://pubmed.ncbi.nlm.nih.gov/35547618/)
31. Zhao J, Zou J, Jiao W, Lin L, Wang J, Lin Z. Construction of N-7 methylguanine-related mRNA prognostic model in uterine corpus endometrial carcinoma based on multi-omics data and immune-related analysis. *Sci Rep.* 2022; 12:18813. <https://doi.org/10.1038/s41598-022-22879-6> PMID:[36335189](https://pubmed.ncbi.nlm.nih.gov/36335189/)
32. Lin Z, Zou J, Sui X, Yao S, Lin L, Wang J, Zhao J. Necroptosis-related lncRNA signature predicts prognosis and immune response for cervical squamous cell carcinoma and endocervical adenocarcinomas. *Sci Rep.* 2022; 12:16285. <https://doi.org/10.1038/s41598-022-20858-5> PMID:[36175606](https://pubmed.ncbi.nlm.nih.gov/36175606/)
33. Davis A, Tinker AV, Friedlander M. “Platinum resistant” ovarian cancer: what is it, who to treat and how to measure benefit? *Gynecol Oncol.* 2014; 133:624–31. <https://doi.org/10.1016/j.ygyno.2014.02.038> PMID:[24607285](https://pubmed.ncbi.nlm.nih.gov/24607285/)
34. Chien J, Kuang R, Landen C, Shridhar V. Platinum-sensitive recurrence in ovarian cancer: the role of tumor microenvironment. *Front Oncol.* 2013; 3:251. <https://doi.org/10.3389/fonc.2013.00251> PMID:[24069583](https://pubmed.ncbi.nlm.nih.gov/24069583/)
35. Haq R, Shoag J, Andreu-Perez P, Yokoyama S, Edelman H, Rowe GC, Frederick DT, Hurley AD, Nellore A, Kung AL, Wargo JA, Song JS, Fisher DE, et al. Oncogenic BRAF regulates oxidative metabolism via PGC1 $\alpha$  and MITF. *Cancer Cell.* 2013; 23:302–15. <https://doi.org/10.1016/j.ccr.2013.02.003> PMID:[23477830](https://pubmed.ncbi.nlm.nih.gov/23477830/)
36. Roesch A, Vultur A, Bogeski I, Wang H, Zimmermann KM, Speicher D, Körbel C, Laschke MW, Gimotty PA, Philipp SE, Krause E, Pätzold S, Villanueva J, et al. Overcoming intrinsic multidrug resistance in melanoma by blocking the mitochondrial respiratory chain of slow-cycling JARID1B(high) cells. *Cancer Cell.* 2013; 23:811–25. <https://doi.org/10.1016/j.ccr.2013.05.003> PMID:[23764003](https://pubmed.ncbi.nlm.nih.gov/23764003/)
37. Toulza E, Mattiuzzo NR, Galliano MF, Jonca N, Dossat C, Jacob D, de Daruvar A, Wincker P, Serre G, Guerrin M. Large-scale identification of human genes implicated in epidermal barrier function. *Genome Biol.* 2007; 8:R107. <https://doi.org/10.1186/gb-2007-8-6-r107> PMID:[17562024](https://pubmed.ncbi.nlm.nih.gov/17562024/)
38. Molina JR, Sun Y, Protopopova M, Gera S, Bandi M, Bristow C, McAfoos T, Morlacchi P, Ackroyd J, Agip AA, Al-Atrash G, Asara J, Bardenhagen J, et al. An inhibitor of oxidative phosphorylation exploits cancer vulnerability. *Nat Med.* 2018; 24:1036–46. <https://doi.org/10.1038/s41591-018-0052-4> PMID:[29892070](https://pubmed.ncbi.nlm.nih.gov/29892070/)
39. Ding Y, Labitzky V, Legler K, Qi M, Schumacher U, Schmalfeldt B, Stürken C, Oliveira-Ferrer L. Molecular characteristics and tumorigenicity of ascites-derived tumor cells: mitochondrial oxidative phosphorylation as a novel therapy target in ovarian cancer. *Mol Oncol.* 2021; 15:3578–95. <https://doi.org/10.1002/1878-0261.13028> PMID:[34060699](https://pubmed.ncbi.nlm.nih.gov/34060699/)
40. Ghilardi C, Moreira-Barbosa C, Brunelli L, Ostano P, Panini N, Lupi M, Anastasia A, Fiordaliso F, Salio M, Formenti L, Russo M, Arrigoni E, Chiaradonna F, et al. PGC1 $\alpha$ / $\beta$  Expression Predicts Therapeutic Response to Oxidative Phosphorylation Inhibition in Ovarian Cancer. *Cancer Res.* 2022; 82:1423–34. <https://doi.org/10.1158/0008-5472.CAN-21-1223> PMID:[35131872](https://pubmed.ncbi.nlm.nih.gov/35131872/)
41. Tang G, Guo J, Zhu Y, Huang Z, Liu T, Cai J, Yu L, Wang Z. Metformin inhibits ovarian cancer via decreasing H3K27 trimethylation. *Int J Oncol.* 2018; 52:1899–911. <https://doi.org/10.3892/ijo.2018.4343> PMID:[29620187](https://pubmed.ncbi.nlm.nih.gov/29620187/)
42. Matassa DS, Amoroso MR, Lu H, Avolio R, Arzeni D, Procaccini C, Faicchia D, Maddalena F, Simeon V, Agliarulo I, Zanini E, Mazzoccoli C, Recchi C, et al. Oxidative metabolism drives inflammation-induced platinum resistance in human ovarian cancer. *Cell Death Differ.* 2016; 23:1542–54. <https://doi.org/10.1038/cdd.2016.39> PMID:[27206315](https://pubmed.ncbi.nlm.nih.gov/27206315/)
43. Pan Y, Yu Y, Wang X, Zhang T. Tumor-Associated Macrophages in Tumor Immunity. *Front Immunol.* 2020; 11:583084. <https://doi.org/10.3389/fimmu.2020.583084> PMID:[33365025](https://pubmed.ncbi.nlm.nih.gov/33365025/)
44. DeNardo DG, Ruffell B. Macrophages as regulators of tumour immunity and immunotherapy. *Nat Rev Immunol.* 2019; 19:369–82. <https://doi.org/10.1038/s41577-019-0127-6> PMID:[30718830](https://pubmed.ncbi.nlm.nih.gov/30718830/)



45. Hao X, Zheng Z, Liu H, Zhang Y, Kang J, Kong X, Rong D, Sun G, Sun G, Liu L, Yu H, Tang W, Wang X. Inhibition of APOC1 promotes the transformation of M2 into M1 macrophages via the ferroptosis pathway and enhances anti-PD1 immunotherapy in hepatocellular carcinoma based on single-cell RNA sequencing. *Redox Biol.* 2022; 56:102463.  
<https://doi.org/10.1016/j.redox.2022.102463>  
PMID:[36108528](https://pubmed.ncbi.nlm.nih.gov/36108528/)
46. West AP, Brodsky IE, Rahner C, Woo DK, Erdjument-Bromage H, Tempst P, Walsh MC, Choi Y, Shadel GS, Ghosh S. TLR signalling augments macrophage bactericidal activity through mitochondrial ROS. *Nature.* 2011; 472:476–80.  
<https://doi.org/10.1038/nature09973>  
PMID:[21525932](https://pubmed.ncbi.nlm.nih.gov/21525932/)
47. Aerbajinai W, Ghosh MC, Liu J, Kumkhaek C, Zhu J, Chin K, Rouault TA, Rodgers GP. Glia maturation factor- $\gamma$  regulates murine macrophage iron metabolism and M2 polarization through mitochondrial ROS. *Blood Adv.* 2019; 3:1211–25.  
<https://doi.org/10.1182/bloodadvances.2018026070>  
PMID:[30971398](https://pubmed.ncbi.nlm.nih.gov/30971398/)
48. Zhang B, Yang Y, Yi J, Zhao Z, Ye R. Hyperglycemia modulates M1/M2 macrophage polarization via reactive oxygen species overproduction in ligature-induced periodontitis. *J Periodontal Res.* 2021; 56:991–1005.  
<https://doi.org/10.1111/jre.12912>  
PMID:[34190354](https://pubmed.ncbi.nlm.nih.gov/34190354/)
49. Pyonteck SM, Akkari L, Schuhmacher AJ, Bowman RL, Sevenich L, Quail DF, Olson OC, Quick ML, Huse JT, Teijeiro V, Setty M, Leslie CS, Oei Y, et al. CSF-1R inhibition alters macrophage polarization and blocks glioma progression. *Nat Med.* 2013; 19:1264–72.  
<https://doi.org/10.1038/nm.3337> PMID:[24056773](https://pubmed.ncbi.nlm.nih.gov/24056773/)
50. Wu A, Wei J, Kong LY, Wang Y, Priebe W, Qiao W, Sawaya R, Heimberger AB. Glioma cancer stem cells induce immunosuppressive macrophages/microglia. *Neuro Oncol.* 2010; 12:1113–25.  
<https://doi.org/10.1093/neuonc/noq082>  
PMID:[20667896](https://pubmed.ncbi.nlm.nih.gov/20667896/)
51. Kuo CL, Chou HY, Chiu YC, Cheng AN, Fan CC, Chang YN, Chen CH, Jiang SS, Chen NJ, Lee AY. Mitochondrial oxidative stress by Lon-PYCR1 maintains an immunosuppressive tumor microenvironment that promotes cancer progression and metastasis. *Cancer Lett.* 2020; 474:138–150.  
<https://doi.org/10.1016/j.canlet.2020.01.019>  
PMID:[31987921](https://pubmed.ncbi.nlm.nih.gov/31987921/)
52. Kuo CL, Ponneri Babuharisankar A, Lin YC, Lien HW, Lo YK, Chou HY, Tangeda V, Cheng LC, Cheng AN, Lee AY. Mitochondrial oxidative stress in the tumor microenvironment and cancer immunoescape: foe or friend? *J Biomed Sci.* 2022; 29:74.  
<https://doi.org/10.1186/s12929-022-00859-2>  
PMID:[36154922](https://pubmed.ncbi.nlm.nih.gov/36154922/)
53. Cheng AN, Cheng LC, Kuo CL, Lo YK, Chou HY, Chen CH, Wang YH, Chuang TH, Cheng SJ, Lee AY. Mitochondrial Lon-induced mtDNA leakage contributes to PD-L1-mediated immunoescape via STING-IFN signaling and extracellular vesicles. *J Immunother Cancer.* 2020; 8:e001372.  
<https://doi.org/10.1136/jitc-2020-001372>  
PMID:[33268351](https://pubmed.ncbi.nlm.nih.gov/33268351/)
54. Chen G, Huang AC, Zhang W, Zhang G, Wu M, Xu W, Yu Z, Yang J, Wang B, Sun H, Xia H, Man Q, Zhong W, et al. Exosomal PD-L1 contributes to immunosuppression and is associated with anti-PD-1 response. *Nature.* 2018; 560:382–6.  
<https://doi.org/10.1038/s41586-018-0392-8>  
PMID:[30089911](https://pubmed.ncbi.nlm.nih.gov/30089911/)
55. Mouton AJ, Li X, Hall ME, Hall JE. Obesity, Hypertension, and Cardiac Dysfunction: Novel Roles of Immunometabolism in Macrophage Activation and Inflammation. *Circ Res.* 2020; 126:789–806.  
<https://doi.org/10.1161/CIRCRESAHA.119.312321>  
PMID:[32163341](https://pubmed.ncbi.nlm.nih.gov/32163341/)
56. Wang J, Zhang ZQ, Li FQ, Chen JN, Gong X, Cao BB, Wang W. Triptolide interrupts rRNA synthesis and induces the RPL23-MDM2-p53 pathway to repress lung cancer cells. *Oncol Rep.* 2020; 43:1863–74.  
<https://doi.org/10.3892/or.2020.7569>  
PMID:[32236588](https://pubmed.ncbi.nlm.nih.gov/32236588/)
57. Zhang F, Hamanaka RB, Bobrovnikova-Marjon E, Gordan JD, Dai MS, Lu H, Simon MC, Diehl JA. Ribosomal stress couples the unfolded protein response to p53-dependent cell cycle arrest. *J Biol Chem.* 2006; 281:30036–45.  
<https://doi.org/10.1074/jbc.M604674200>  
PMID:[16893887](https://pubmed.ncbi.nlm.nih.gov/16893887/)
58. Yang M, Zhou Y, Deng H, Zhou H, Cheng S, Zhang D, He X, Mai L, Chen Y, Chen J. Ribosomal Protein L23 Drives the Metastasis of Hepatocellular Carcinoma via Upregulating MMP9. *Front Oncol.* 2021; 11:779748.  
<https://doi.org/10.3389/fonc.2021.779748>  
PMID:[34926291](https://pubmed.ncbi.nlm.nih.gov/34926291/)
59. Shi Y, Zhai H, Wang X, Han Z, Liu C, Lan M, Du J, Guo C, Zhang Y, Wu K, Fan D. Ribosomal proteins S13 and L23 promote multidrug resistance in gastric cancer cells by suppressing drug-induced apoptosis. *Exp Cell Res.* 2004; 296:337–46.  
<https://doi.org/10.1016/j.yexcr.2004.02.009>  
PMID:[15149863](https://pubmed.ncbi.nlm.nih.gov/15149863/)

60. Qi Y, Li X, Chang C, Xu F, He Q, Zhao Y, Wu L. Ribosomal protein L23 negatively regulates cellular apoptosis via the RPL23/Miz-1/c-Myc circuit in higher-risk myelodysplastic syndrome. *Sci Rep.* 2017; 7:2323. <https://doi.org/10.1038/s41598-017-02403-x>  
PMID:[28539603](https://pubmed.ncbi.nlm.nih.gov/28539603/)
61. Kang H, Choi MC, Kim S, Jeong JY, Kwon AY, Kim TH, Kim G, Joo WD, Park H, Lee C, Song SH, Jung SG, Hwang S, An HJ. *USP19* and *RPL23* as Candidate Prognostic Markers for Advanced-Stage High-Grade Serous Ovarian Carcinoma. *Cancers (Basel).* 2021; 13:3976. <https://doi.org/10.3390/cancers13163976>  
PMID:[34439131](https://pubmed.ncbi.nlm.nih.gov/34439131/)

SUPPLEMENTARY MATERIALS

Supplementary Figure

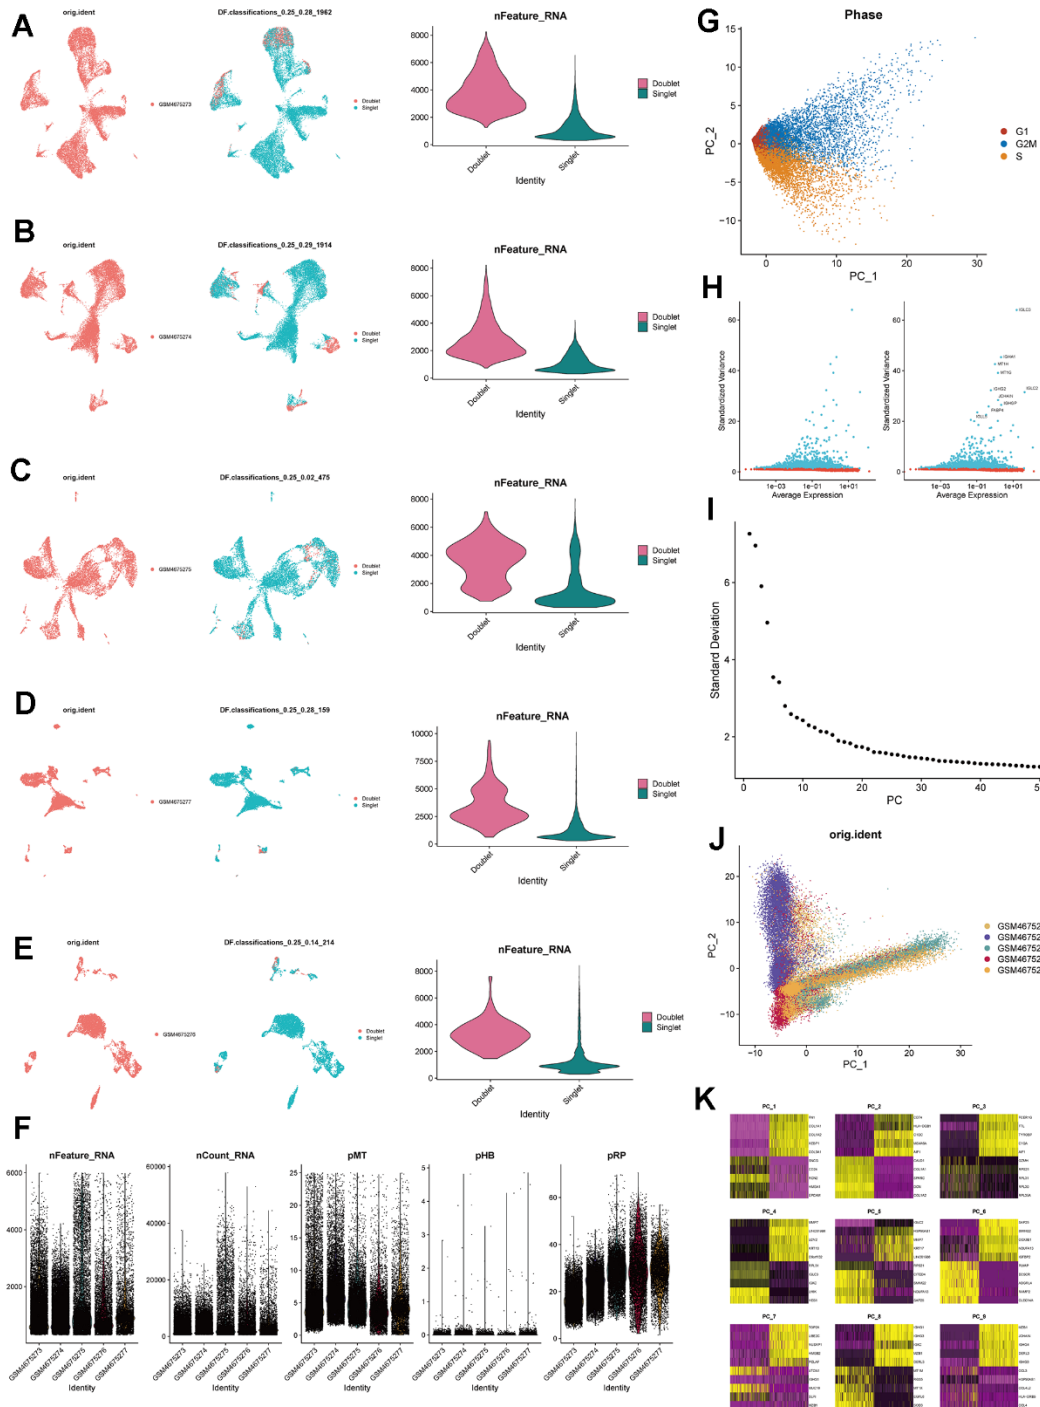

**Supplementary Figure 1. Data control and standard procedures.** (A–E) The dimplot and violin plots illustrate the distribution of double cells in each single-cell sample. (F) Violin plots of the filtered data. (G) Cell cycle distribution. (H) Distribution of highly variable genes. (I) Differences in each dimension. (J) Sample distribution in the first two principal components (PC1 and PC2). (K) Highly variable genes in each principal component (first 9 PCs).
