# Supplementary material for: Investigating the mechanisms of drug resistance and prognosis in ovarian cancer using single-cell RNA sequencing and bulk RNA sequencing
Source: Aging (Albany NY). 2024 Mar 8;16(5):4736–58. doi: 10.18632/aging.205628 (PMC10968697; doi:10.18632/aging.205628)
Supplement: Supplementary Figure 1 [file aging-16-205628-s001.pdf]

## SUPPLEMENTARY FIGURE

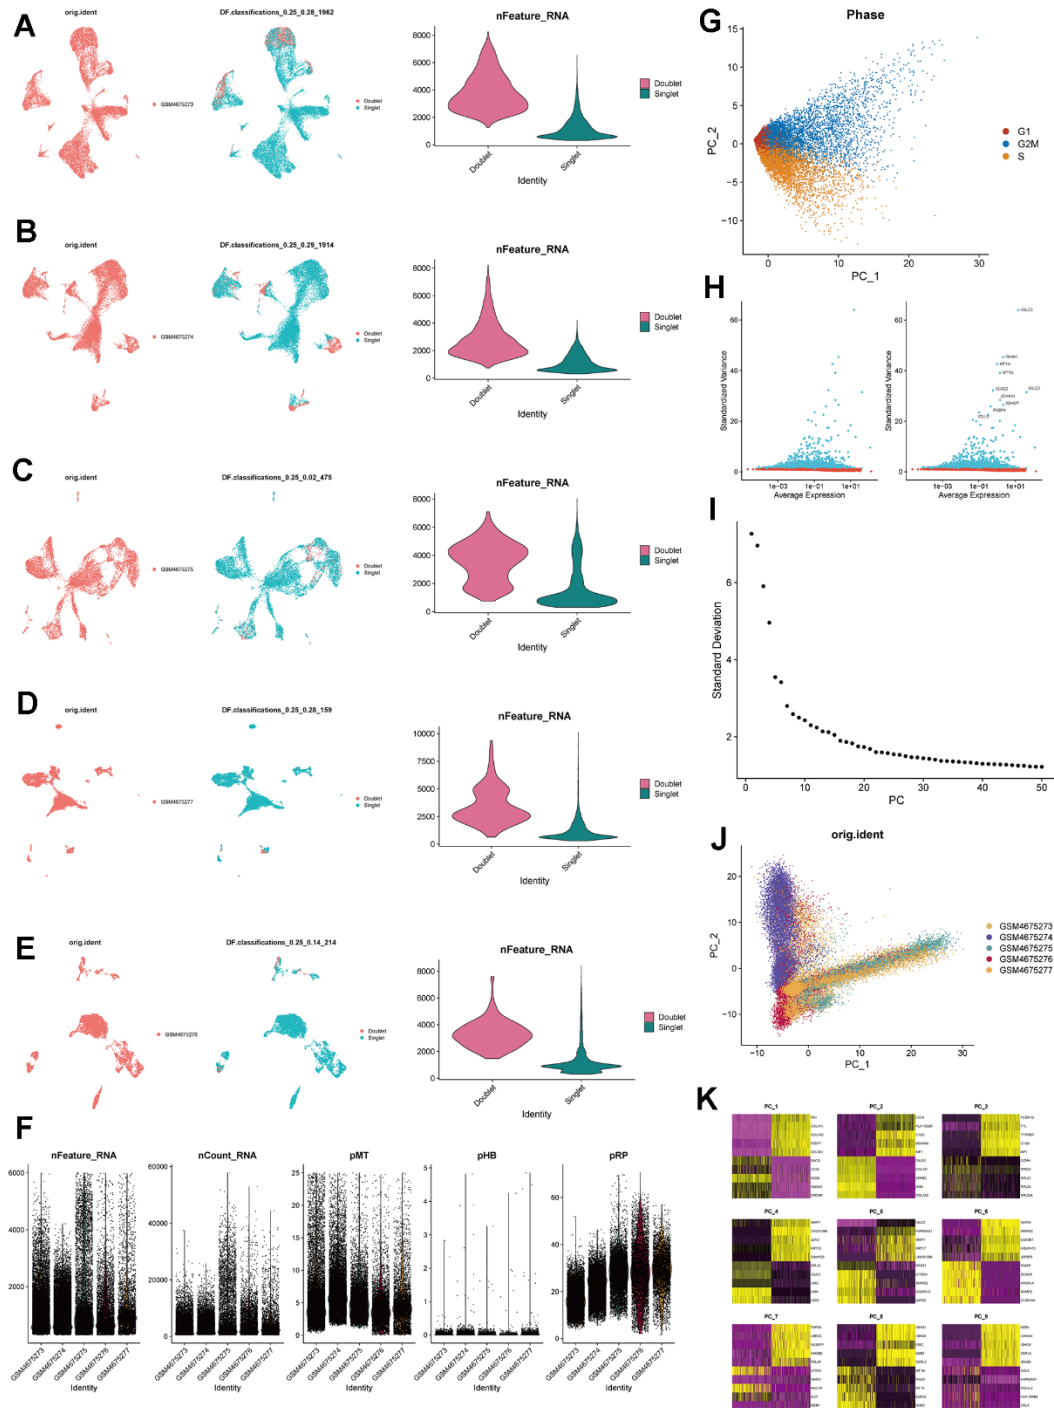

**Supplementary Figure 1. Data control and standard procedures.** (A–E) The dimplot and violin plots illustrate the distribution of double cells in each single-cell sample. (F) Violin plots of the filtered data. (G) Cell cycle distribution. (H) Distribution of highly variable genes. (I) Differences in each dimension. (J) Sample distribution in the first two principal components (PC1 and PC2). (K) Highly variable genes in each principal component (first 9 PCs).
